# Supplementary material for: Beyond transition block metals: exploring the reactivity of phosphine PTA and its oxide [PTA(O)] towards gallium(iii)
Source: Royal Society of Chemistry journal article supplement (doi:10.1039/d4ra02877e), 2024-01-01
Supplement: d4ra02877e1.pdf [file d4ra02877e1.pdf]

## Beyond Transition Block Metals: Exploring the Reactivity of Phosphines PTA and its oxide [PTA(O)] towards Gallium(III)

Antonella Guerriero,<sup>a\*</sup> Andrea Ienco,<sup>a</sup> Thomas Hicks,<sup>b</sup> Agostino Cilibrizzi<sup>c\*</sup>

<sup>a</sup> Consiglio Nazionale delle Ricerche (CNR), Istituto di Chimica dei Composti OrganoMetallici (ICCOM), Via Madonna del Piano 10, 50019 Sesto Fiorentino (Florence), Italy.

<sup>b</sup> Department of Chemistry, King's College London, 7 Trinity Street, London SE1 1DB, United Kingdom.

<sup>c</sup> Institute of Pharmaceutical Science, King's College London, Franklin Wilkins Building, London SE1 9NH, United Kingdom.

### SUPPORTING INFORMATION

#### Table of Contents

|                                                                                                                                                                                              |     |
|----------------------------------------------------------------------------------------------------------------------------------------------------------------------------------------------|-----|
| 1. FT-IR spectra of compounds <b>1</b> – <b>4</b> .                                                                                                                                          | S2  |
| 2. NMR spectra of compounds <b>1</b> – <b>4</b> .                                                                                                                                            | S6  |
| 3. <sup>1</sup> H-DOSY experiments for compounds [PTA-H]•[GaCl <sub>4</sub> ] ( <b>1</b> ), [PTA(O)-H]•[GaCl <sub>4</sub> ] ( <b>2</b> ), PTA and [PTA(O)]: general information and spectra. | S15 |
| 4. Inductively coupled plasma mass spectrometry (ICP-MS): general information and measurements for compounds <b>1</b> and <b>2</b> .                                                         | S20 |
| 5. Tests of stability in aqueous solution for compounds [PTA-H]•[GaCl <sub>4</sub> ] ( <b>1</b> ) and [PTA(O)-H]•[GaCl <sub>4</sub> ] ( <b>2</b> ).                                          | S22 |
| 6. CSD search.                                                                                                                                                                               | S23 |
| 7. Additional drawing of X-Ray Structures.                                                                                                                                                   | S23 |
| 8. Fingerprint plots for compounds [PTA-H]•[GaCl <sub>4</sub> ] ( <b>1</b> ), [PTA(O)-H]•[GaCl <sub>4</sub> ] ( <b>2</b> ) and [PTA(O)-H]•[I] ( <b>4</b> ).                                  | S24 |
| 9. DFT calculations and cartesian coordinates of optimized compounds.                                                                                                                        | S27 |

## 1. FT-IR spectra of compounds 1 – 4

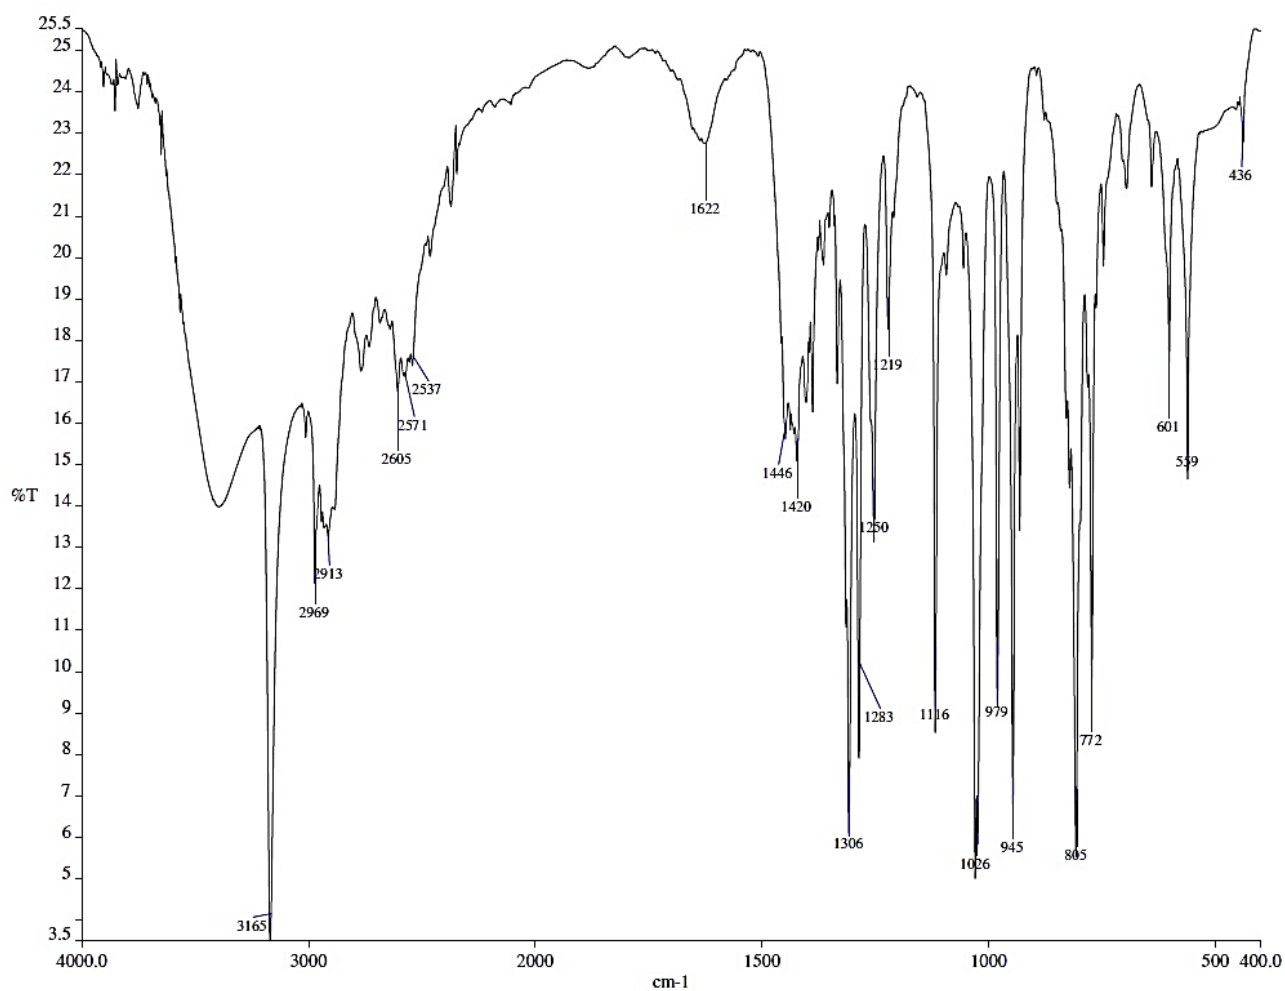

**Figure S1.** FT-IR spectrum of compound [PTA-H]•[GaCl<sub>4</sub>] (1) in KBr (range 400-4000 cm<sup>-1</sup>).

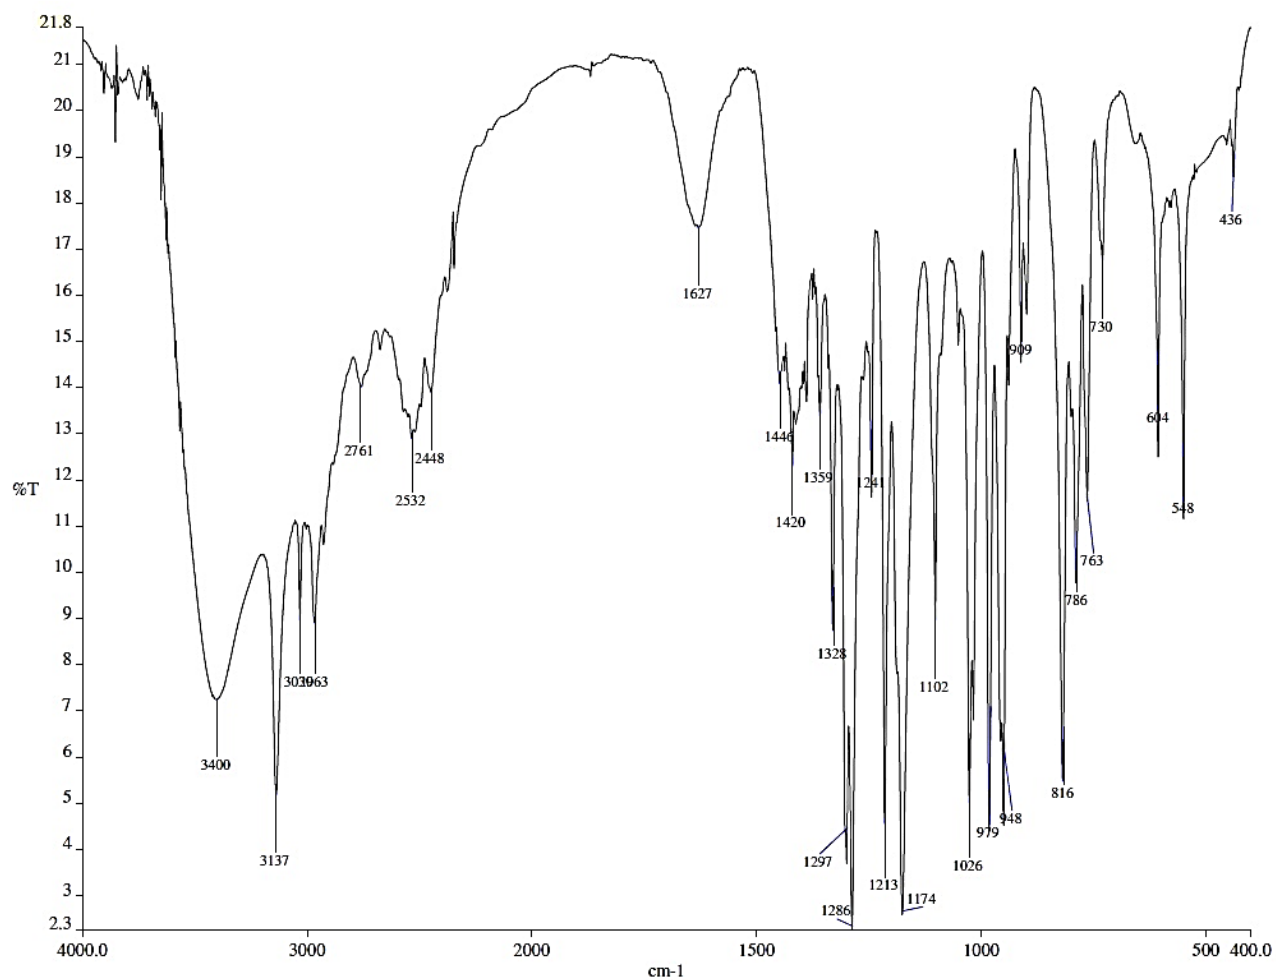

**Figure S2.** FT-IR spectrum of compound [PTA(O)-H]•[GaCl<sub>4</sub>] (2) in KBr (range 400-4000 cm<sup>-1</sup>).

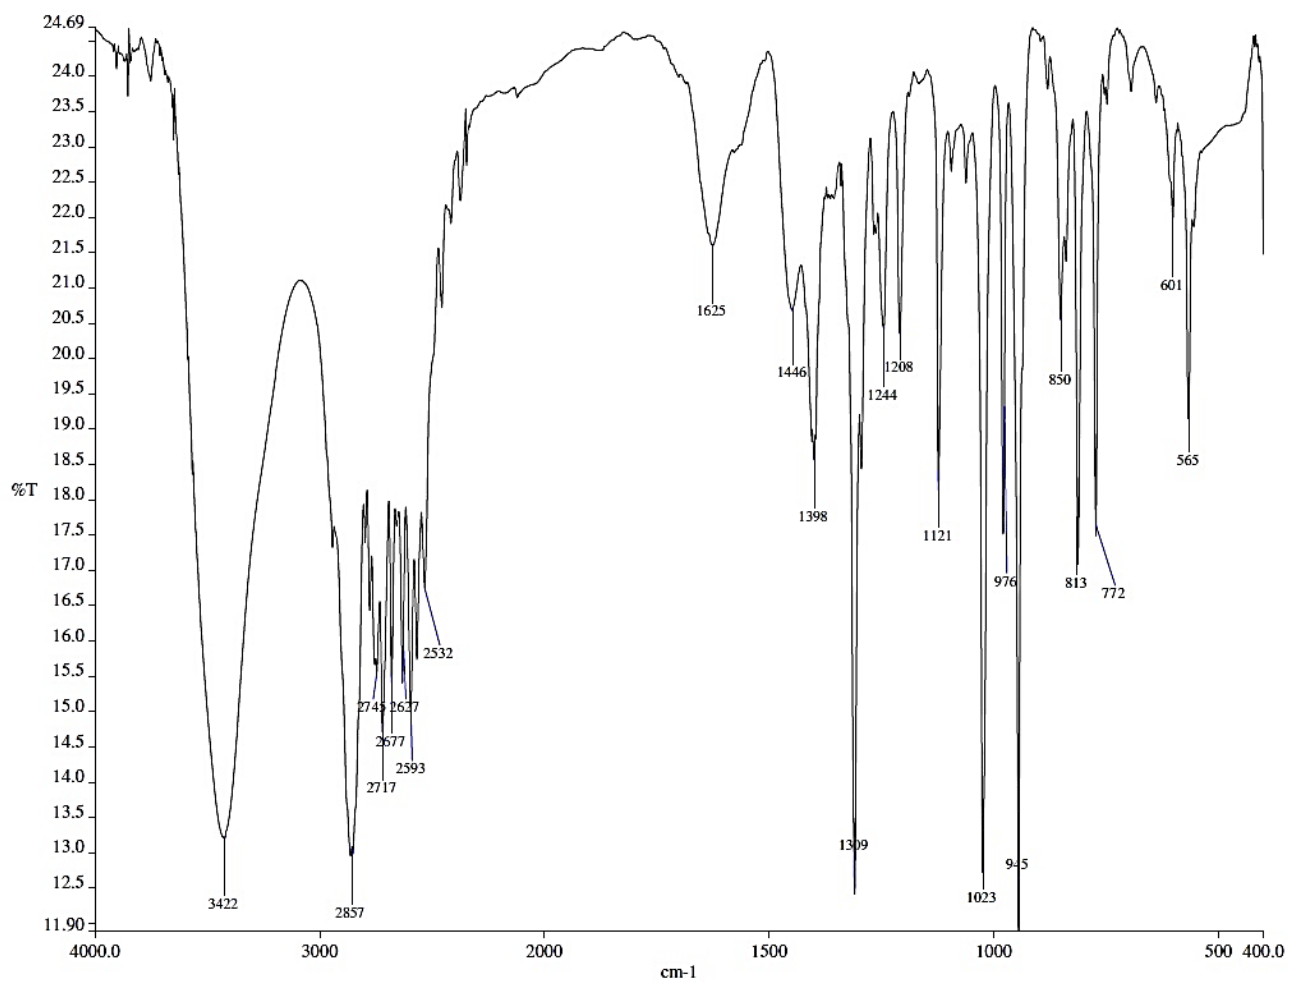

**Figure S3.** FT-IR spectrum of compound [PTA-H]•[I] (3) in KBr (range 400-4000 cm<sup>-1</sup>).

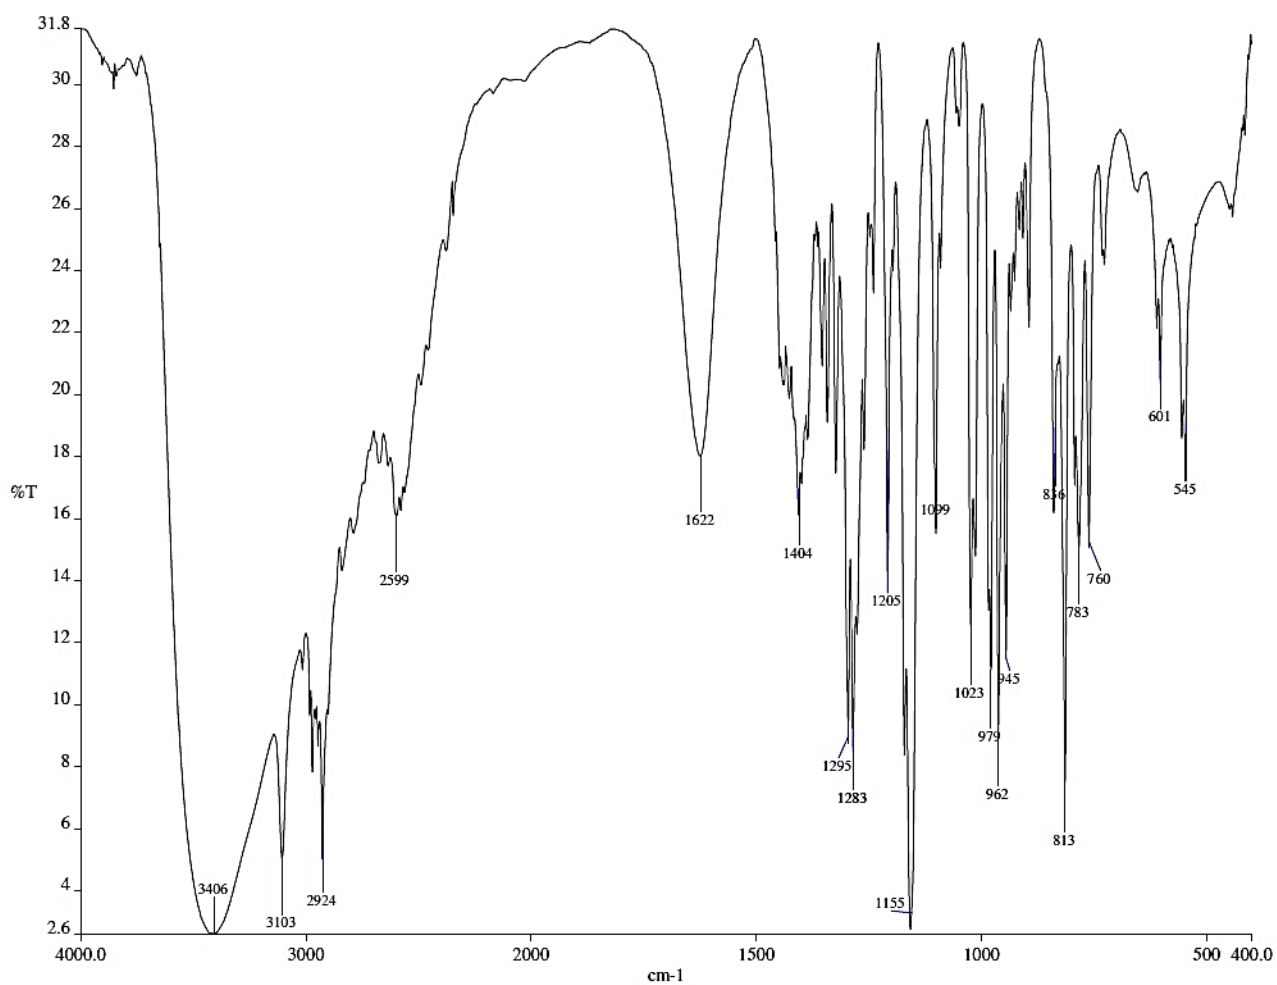

**Figure S4.** FT-IR spectrum of compound [PTA(O)-H]•[I] (**4**) in KBr (range 400-4000 cm<sup>-1</sup>).

## 2. NMR spectra of compounds 1 – 4

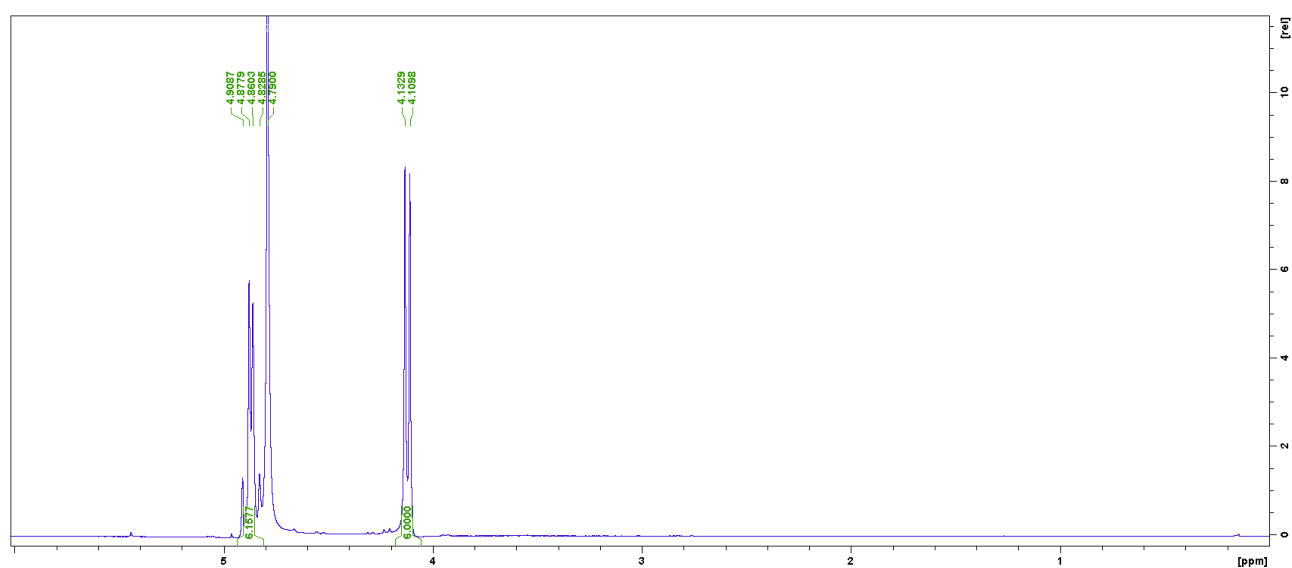

**Figure S5.**  $^1\text{H}$  NMR of compound  $[\text{PTA-H}]\cdot[\text{GaCl}_4]$  (1) in  $\text{D}_2\text{O}$  (400.13 MHz, recorded at 298K with a spectral width of 10 ppm, expanded in the region where signals were detected)

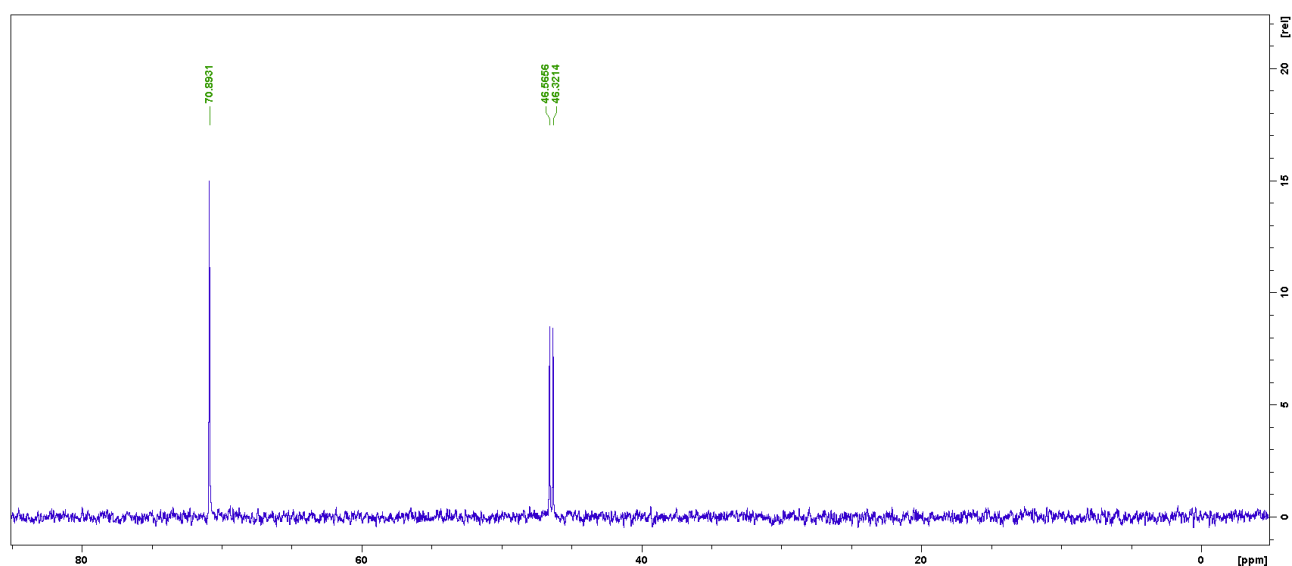

**Figure S6.**  $^{13}\text{C}\{^1\text{H}\}$  NMR of compound  $[\text{PTA-H}]\cdot[\text{GaCl}_4]$  (1) in  $\text{D}_2\text{O}$  (100.61 MHz, recorded at 298K with a spectral width of 130 ppm, expanded in the figure in the region where signals were detected)

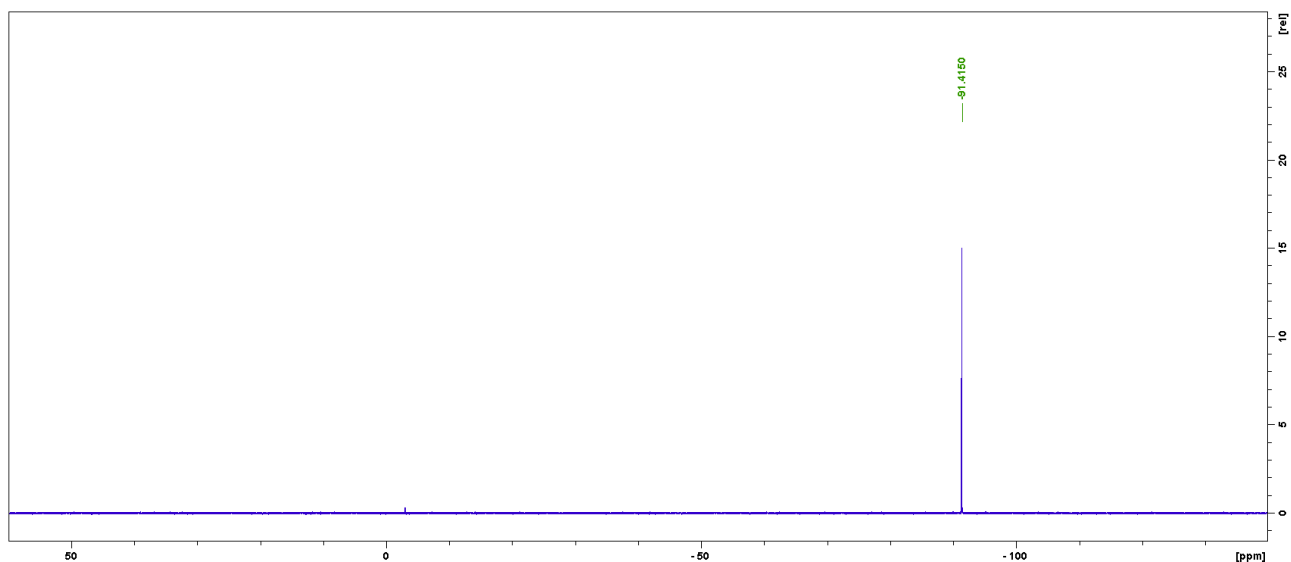

**Figure S7.**  $^{31}\text{P}\{^1\text{H}\}$  NMR of compound  $[\text{PTA-H}]\cdot[\text{GaCl}_4]$  (**1**) in  $\text{D}_2\text{O}$  (161.98 MHz, recorded at 298K with a spectral width of 200 ppm)

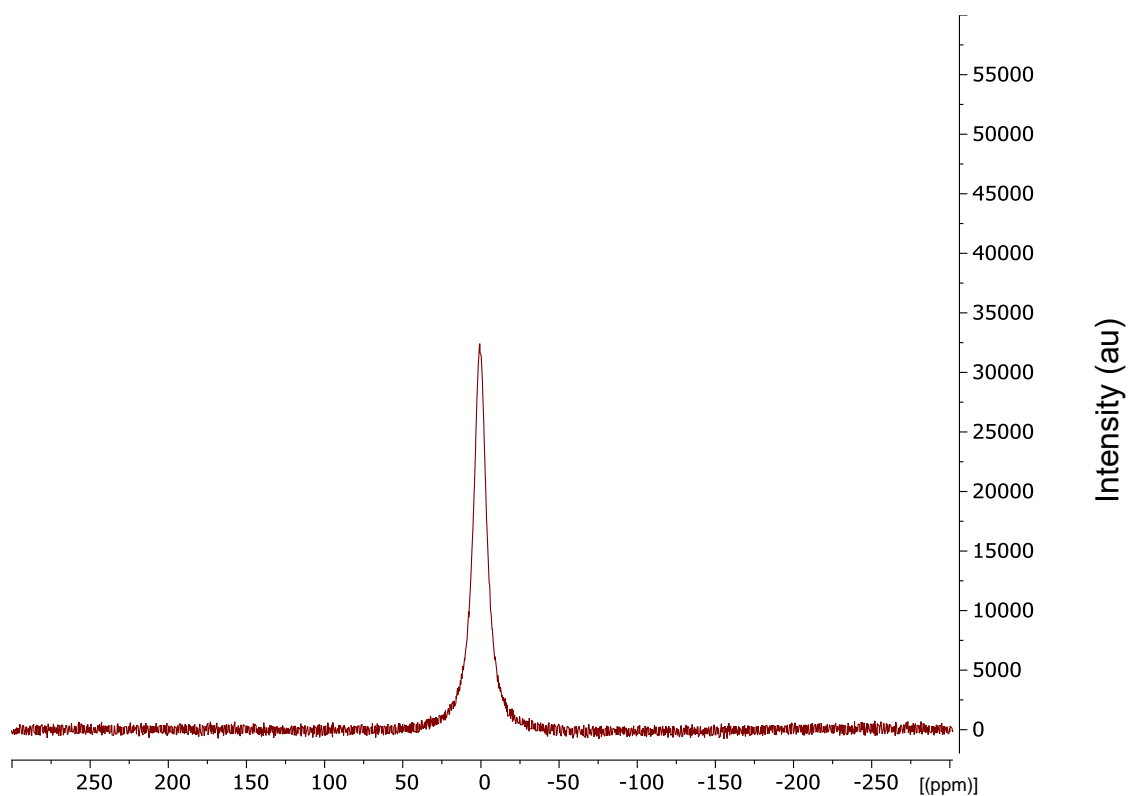

**Figure S8.**  $^{71}\text{Ga}$  NMR spectrum of  $[\text{PTA-H}]\cdot[\text{GaCl}_4]$  (**1**) in  $\text{D}_2\text{O}$  (recorded at 298K with a transmitter frequency offset of 0 ppm and a spectral width of 600 ppm, expanded in the figure in the region where signal was detected).

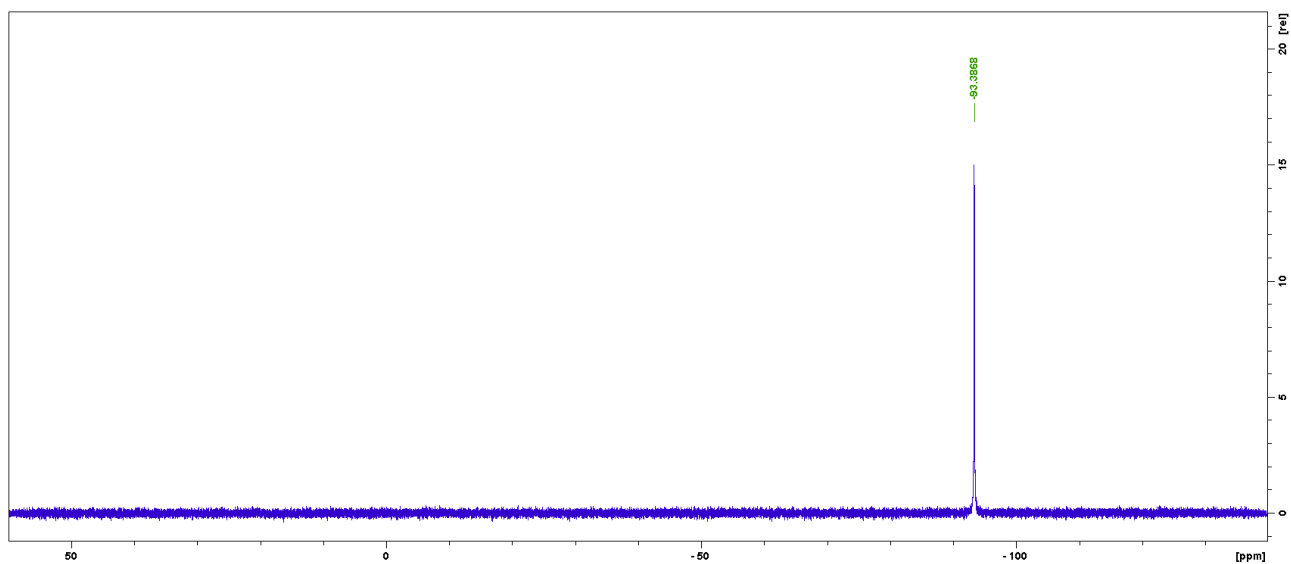

**Figure S9.**  $^{31}\text{P}\{^1\text{H}\}$  NMR of DCM mother solution of  $[\text{PTA-H}]\cdot[\text{GaCl}_4]$  (**1**) (161.98 MHz, recorded with a  $\text{C}_6\text{D}_6$  insert at 298K, with a spectral width of 200 ppm).

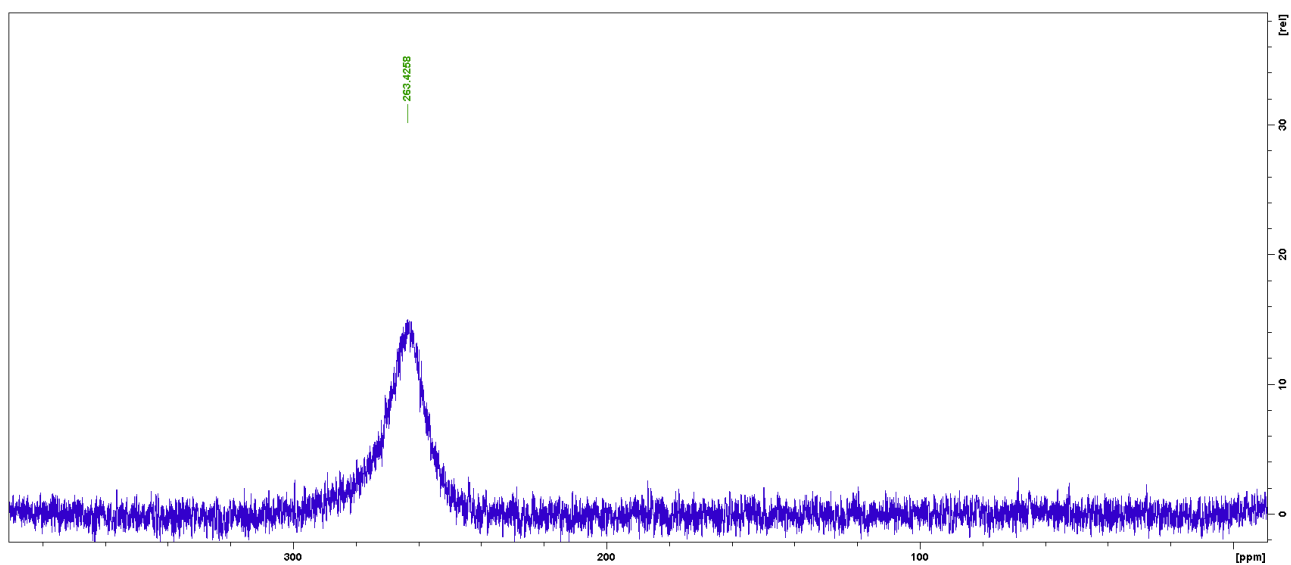

**Figure S10.**  $^{71}\text{Ga}$  NMR spectrum of DCM mother solution of  $[\text{PTA-H}]\cdot[\text{GaCl}_4]$  (**1**) (122.03 MHz, recorded with a  $\text{C}_6\text{D}_6$  insert at 298K, with a spectral width of 400 ppm).



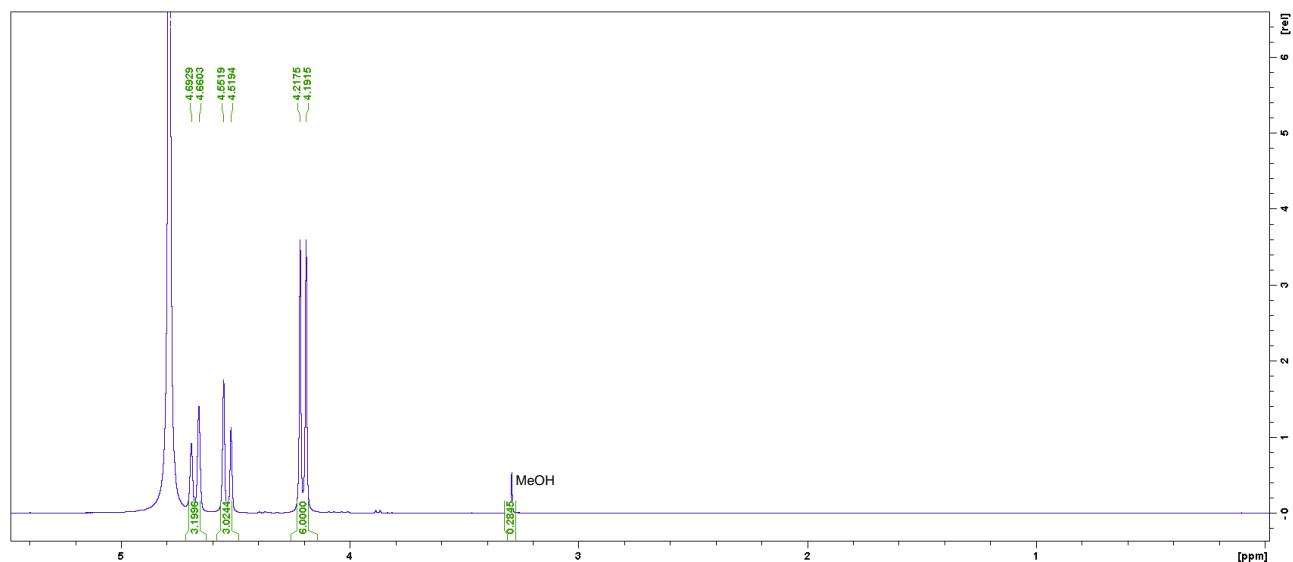

**Figure S11.**  $^1\text{H}$  NMR of compound  $[\text{PTA}(\text{O})\text{-H}]\cdot[\text{GaCl}_4]$  (**2**) in  $\text{D}_2\text{O}$  (400.13 MHz, recorded at 298K with a spectral width of 12 ppm, expanded in the figure in the region where signals were detected)

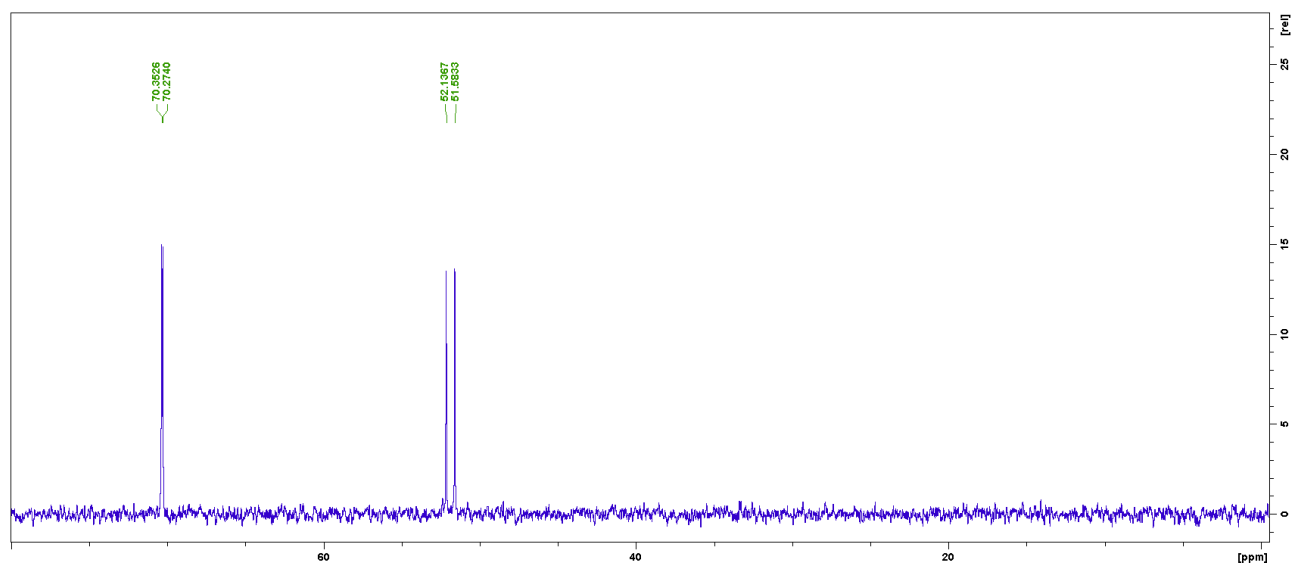

**Figure S12.**  $^{13}\text{C}\{^1\text{H}\}$  NMR of compound  $[\text{PTA}(\text{O})\text{-H}]\cdot[\text{GaCl}_4]$  (**2**) in  $\text{D}_2\text{O}$  (100.61 MHz, recorded at 298K with a spectral width of 150 ppm, expanded in the figure in the region where signals were detected)

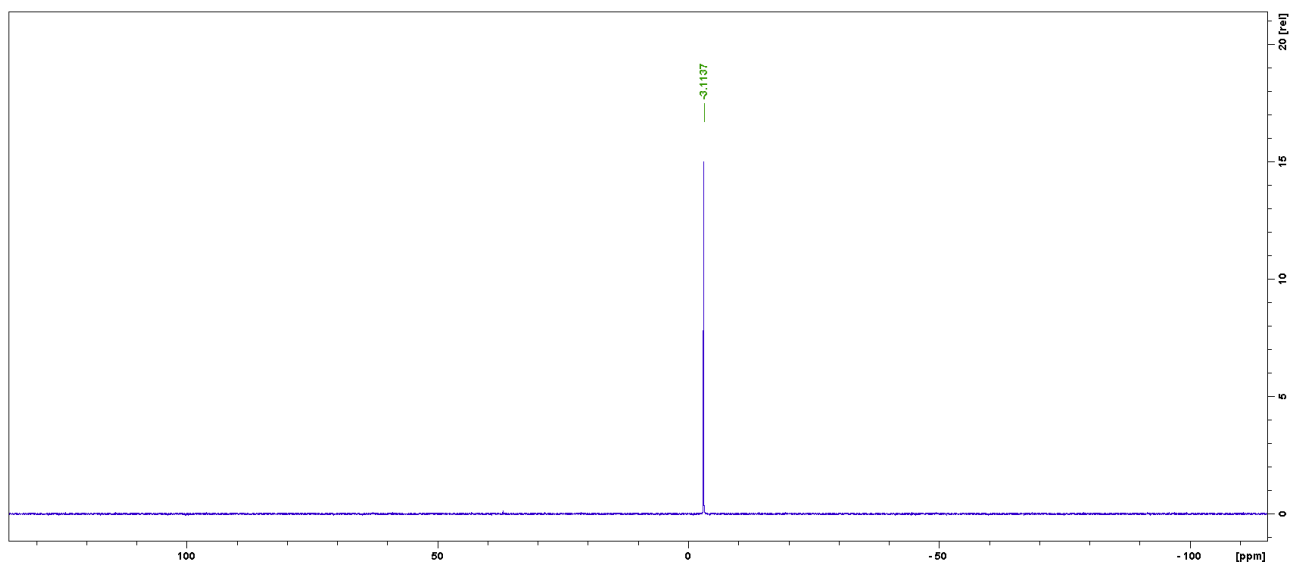

**Figure S13.**  $^{31}\text{P}\{^1\text{H}\}$  NMR of compound  $[\text{PTA}(\text{O})\text{-H}]\cdot[\text{GaCl}_4]$  (**2**) in  $\text{D}_2\text{O}$  (161.98 MHz, recorded at 298K with a spectral width of 250 ppm)

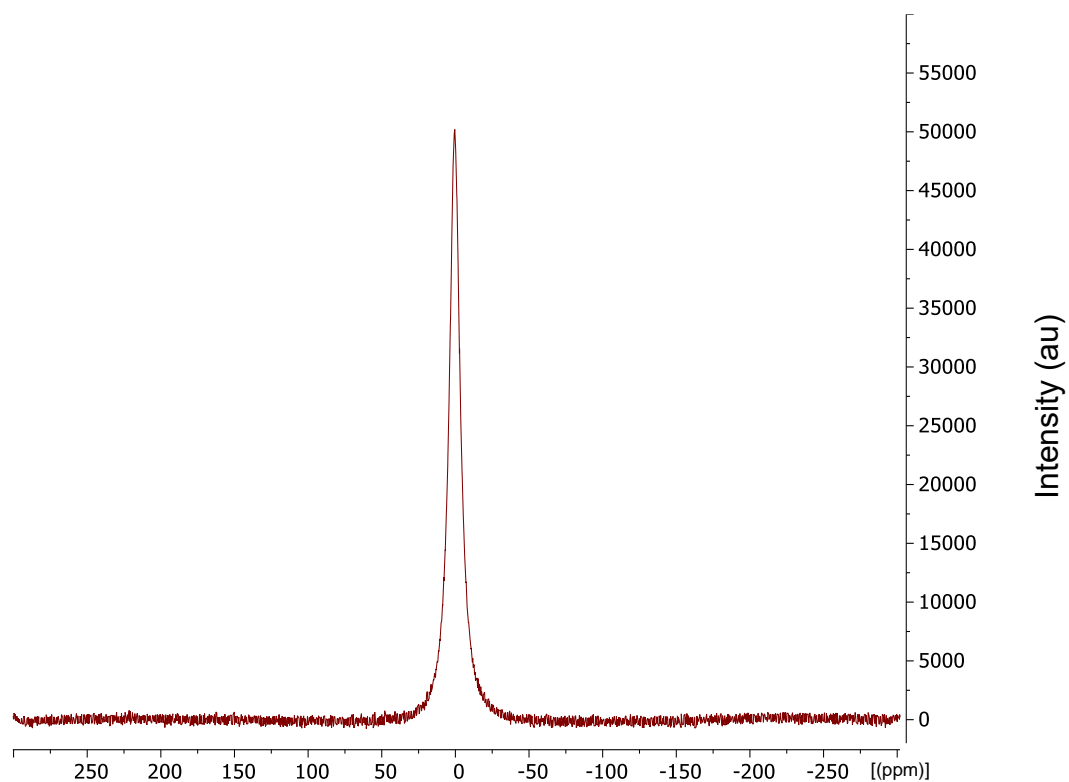

**Figure S14.**  $^{71}\text{Ga}$  NMR spectrum of  $[\text{PTA}(\text{O})\text{-H}]\cdot[\text{GaCl}_4]$  (**2**) in  $\text{D}_2\text{O}$  (recorded at 298K with a transmitter frequency offset of 0 ppm and a spectral width of 600 ppm, expanded in the figure in the region where signals was detected).

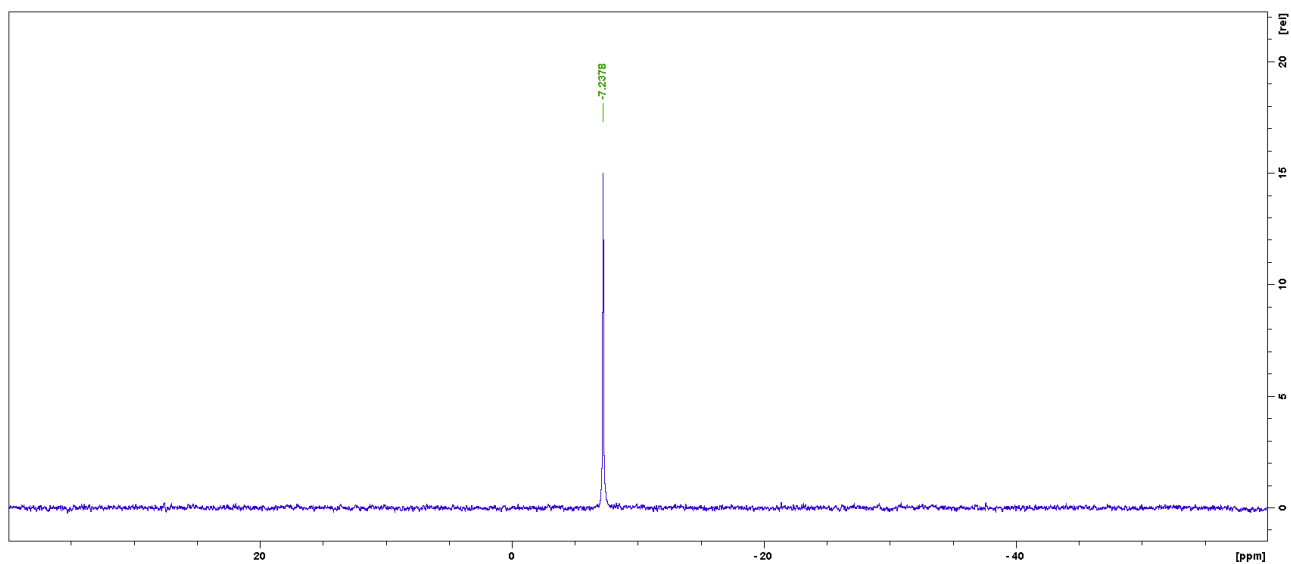

**Figure S15.**  $^{31}\text{P}\{^1\text{H}\}$  NMR of DCM/MeOH mother solution of  $[\text{PTA}(\text{O})\text{-H}]\cdot[\text{GaCl}_4]$  (**2**) (161.98 MHz, recorded with a  $\text{C}_6\text{D}_6$  insert at 298K with a spectral width of 100 ppm)

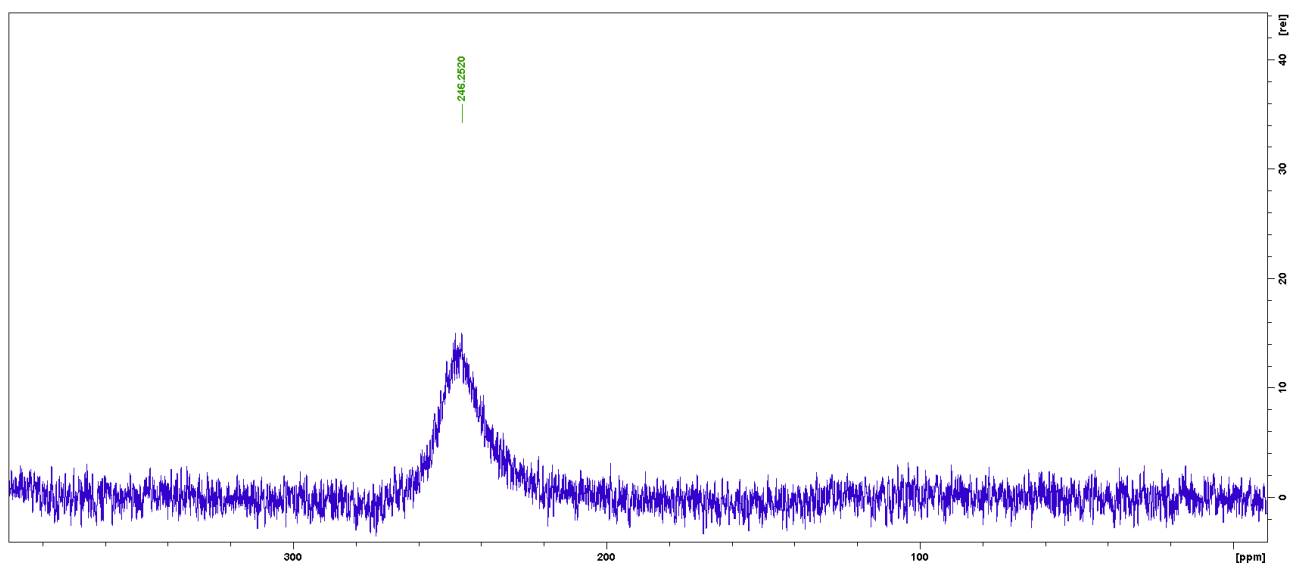

**Figure S16.**  $^{71}\text{Ga}$  NMR spectrum of DCM/MeOH mother solution of  $[\text{PTA}(\text{O})\text{-H}]\cdot[\text{GaCl}_4]$  (**2**) (122.03 MHz, recorded with a  $\text{C}_6\text{D}_6$  insert, at 298K, with a spectral width of 400 ppm).

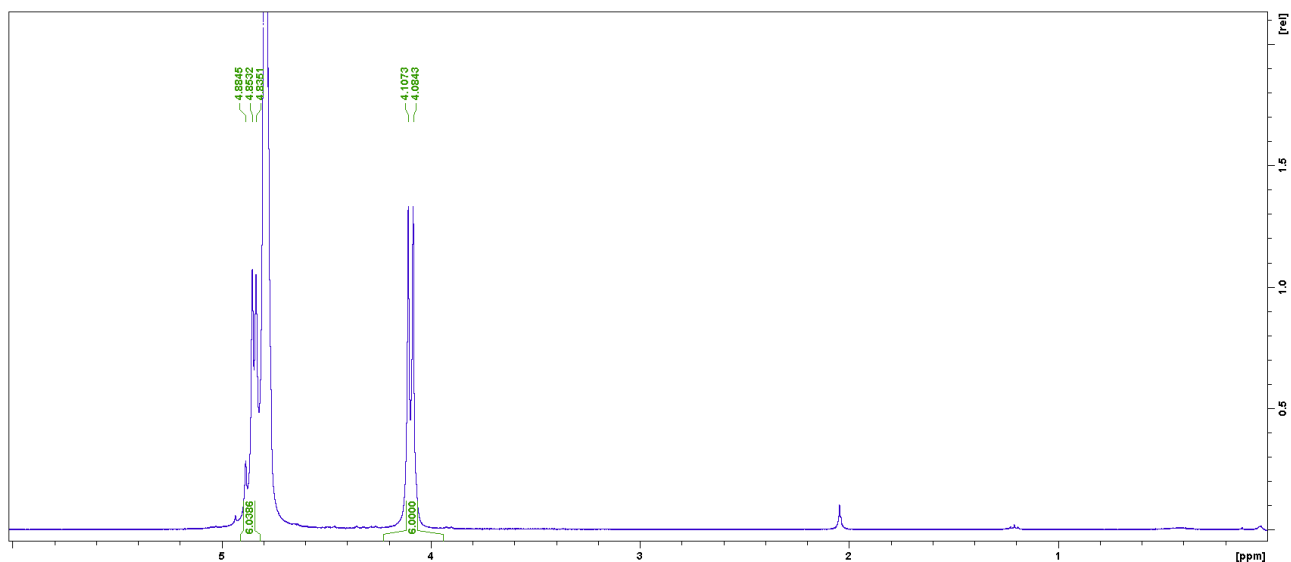

**Figure S17.**  $^1\text{H}$  NMR of compound  $[\text{PTA-H}] \cdot [\text{I}]$  (**3**) in  $\text{D}_2\text{O}$  (400.13 MHz, recorded at 298K with a spectral width of 12 ppm, expanded in the figure in the region where signals were detected)

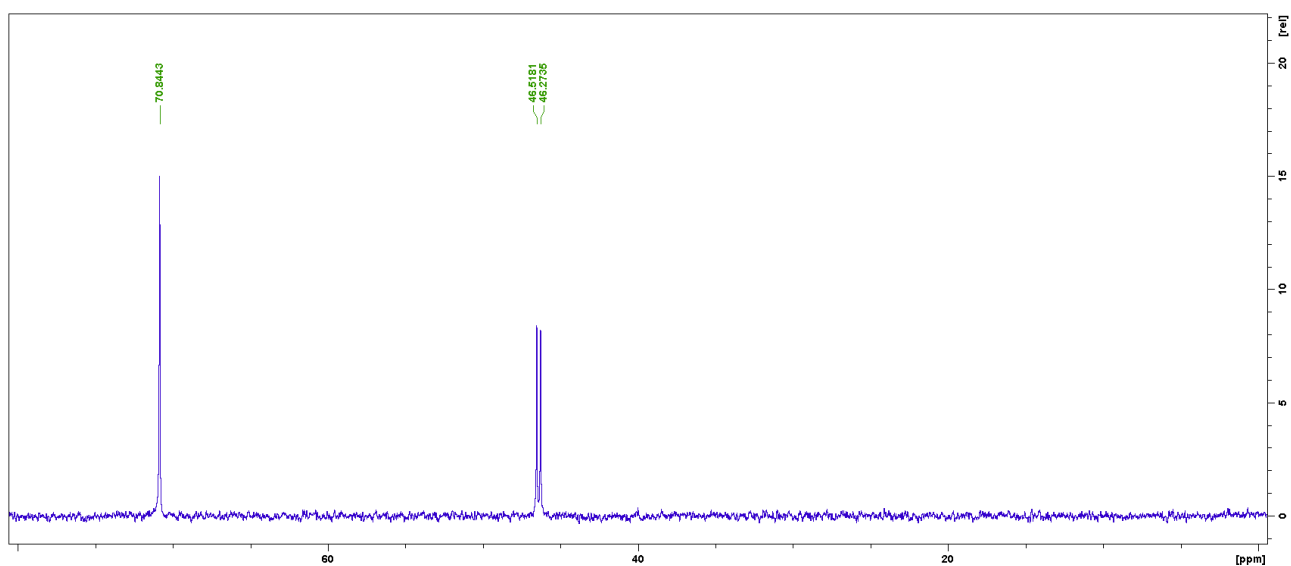

**Figure S18.**  $^{13}\text{C}\{^1\text{H}\}$  NMR of compound  $[\text{PTA-H}] \cdot [\text{I}]$  (**3**) in  $\text{D}_2\text{O}$  (100.61 MHz, recorded at 298K with a spectral width of 110 ppm, expanded in the figure in the region where signals were detected)

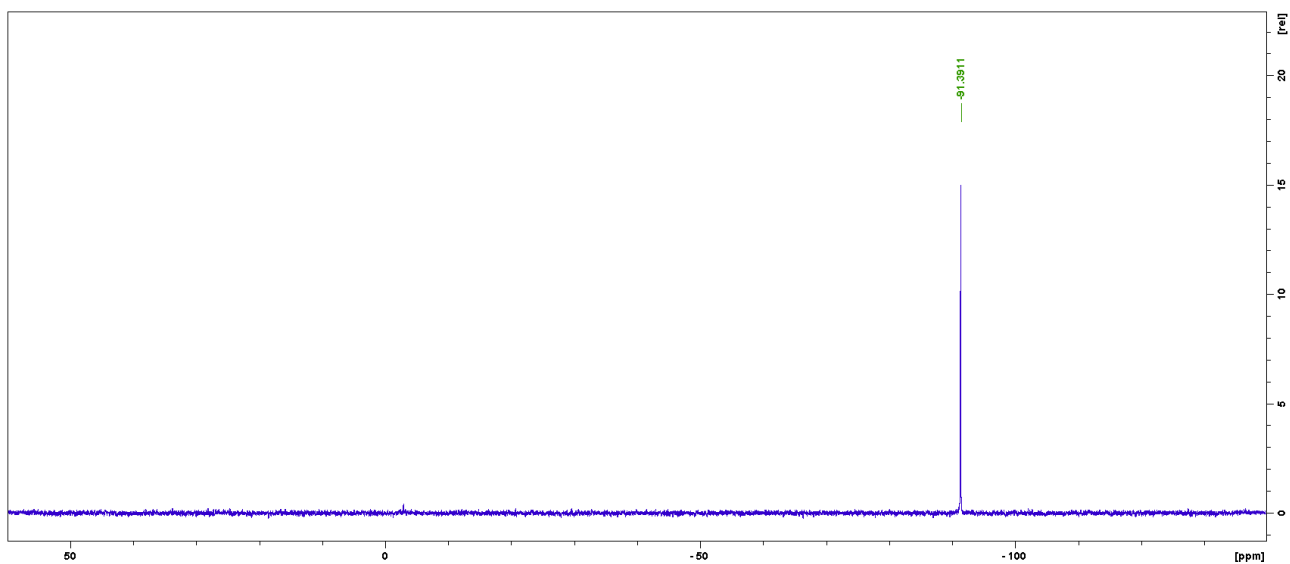

**Figure S19.**  $^{31}\text{P}\{^1\text{H}\}$  NMR of compound  $[\text{PTA-H}]\cdot[\text{I}]$  (**3**) in  $\text{D}_2\text{O}$  (161.98 MHz, recorded at 298K with a spectral width of 250 ppm)

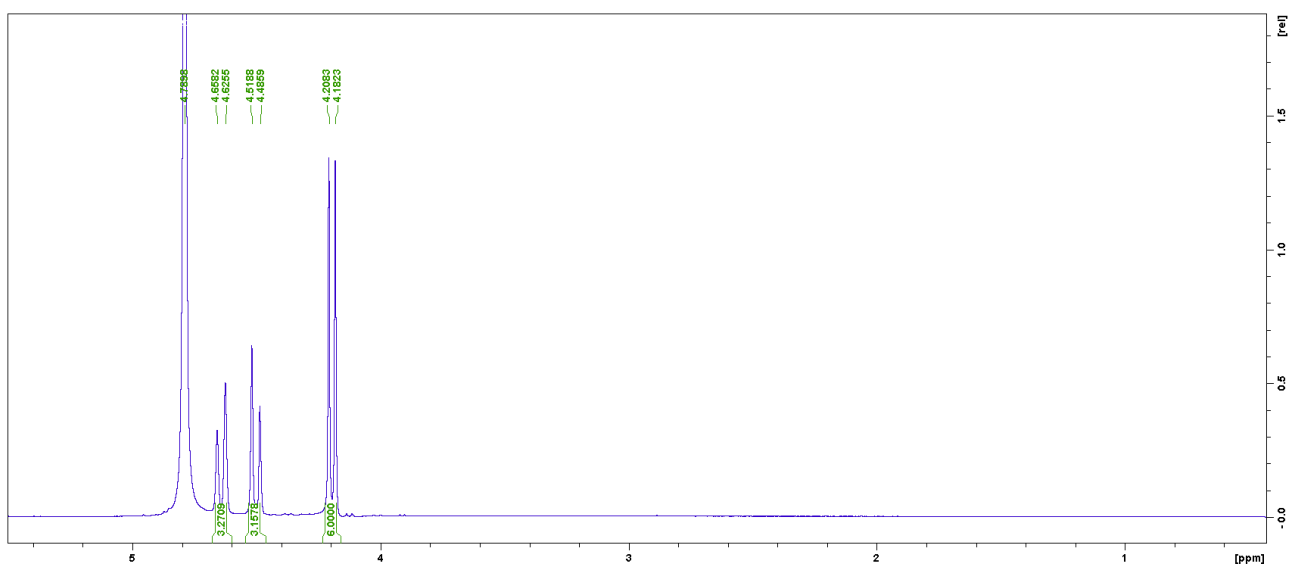

**Figure S20.**  $^1\text{H}$  NMR of compound  $[\text{PTA(O)-H}]\cdot[\text{I}]$  (**4**) in  $\text{D}_2\text{O}$  (400.13 MHz, recorded at 298K with a spectral width of 12 ppm, expanded in the figure in the region where signals were detected)

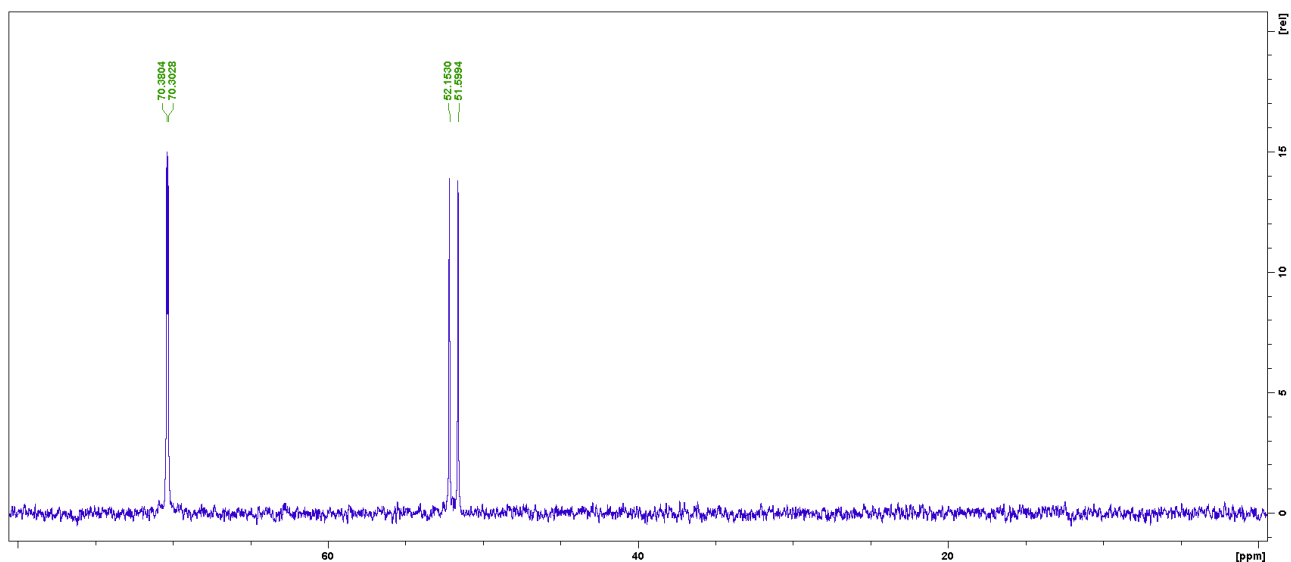

**Figure S21.**  $^{13}\text{C}\{^1\text{H}\}$  NMR of compound  $[\text{PTA}(\text{O})\text{-H}]\cdot[\text{I}]$  (**4**) in  $\text{D}_2\text{O}$  (100.61 MHz, recorded at 298K with a spectral width of 110 ppm, expanded in the figure in the region where signals were detected)

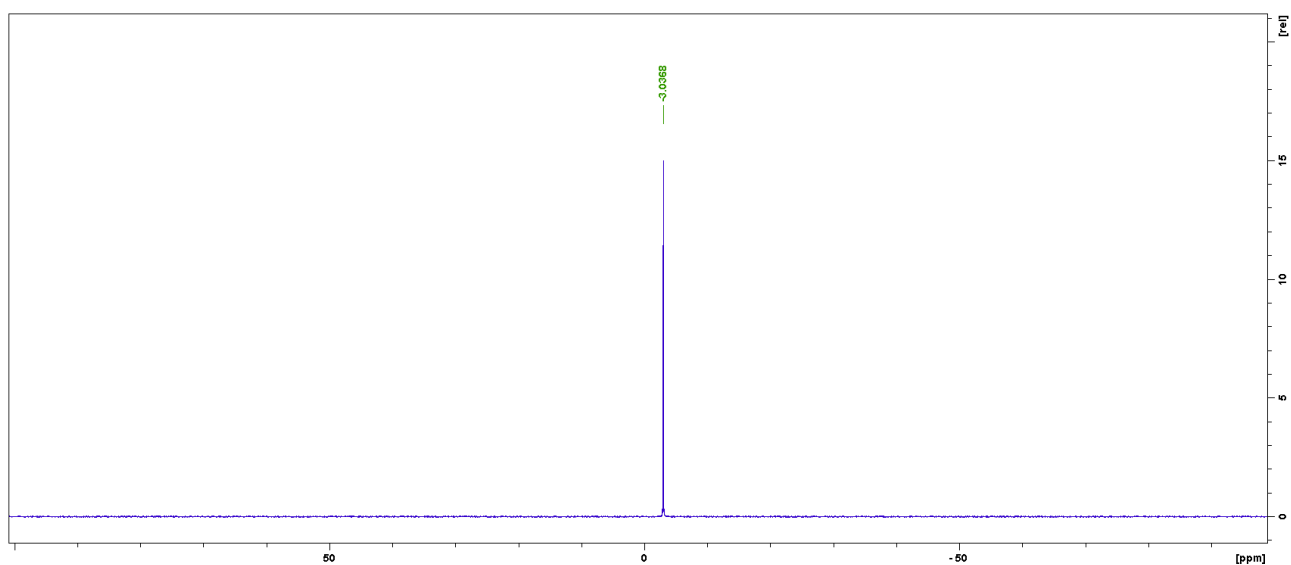

**Figure S22.**  $^{31}\text{P}\{^1\text{H}\}$  NMR of compound  $[\text{PTA}(\text{O})\text{-H}]\cdot[\text{I}]$  (**4**) in  $\text{D}_2\text{O}$  (161.98 MHz, recorded at 298K with a spectral width of 200 ppm)

### 3. <sup>1</sup>H-DOSY experiments for compounds [PTA-H]•[GaCl<sub>4</sub>] (1), [PTA(O)-H]•[GaCl<sub>4</sub>] (2), PTA and [PTA(O)]: general information and spectra

The intensities of the phosphor-coupled doublet of the [PTA-H]<sup>+</sup> and [PTA(O)-H]<sup>+</sup> ions from the DOSY experiments were plotted against the gradient strength. To derive their diffusion constants (**D**) in deuterated water, the data were fit to equation 1.

$$\text{Eq 1)} \quad I = I_0 e^{-D^2 \gamma^2 \delta^2 \left(\frac{\Delta - \delta}{3}\right)}$$

Where; **I** is the measured signal intensity, **I<sub>0</sub>** is the initial signal intensity,  $\gamma$  is the gyromagnetic ratio of <sup>1</sup>H,  $\Delta$  is the diffusion time and  $\delta$  is the gradient pulse width.

To find the hydrodynamic radius ( $r_s$ ) of each ion, equation 2 was used with a temperature (T) of 298K and a deuterated water viscosity ( $\eta$ ) of  $1.1 \times 10^{-3} \text{ kg m}^{-1} \text{ s}^{-1}$ .<sup>[1]</sup>

$$\text{Eq 2)} \quad D = \frac{k_b T}{6 \pi \eta r_s}$$

Where;  $k_b$  is the Boltzmann constant.

Using this equation, the hydrodynamic radii of [PTA-H]<sup>+</sup>, [PTA(O)-H]<sup>+</sup>, PTA and [PTA(O)] were found to be 3.36 Å, 3.52 Å, 3.92 Å and 3.72 Å, respectively.

[1] R. Evans, G. Dal Poggetto, M. Nilsson, G. A. Morris. *Anal. Chem.* **2018**, *90*, 6, 3987–3994.

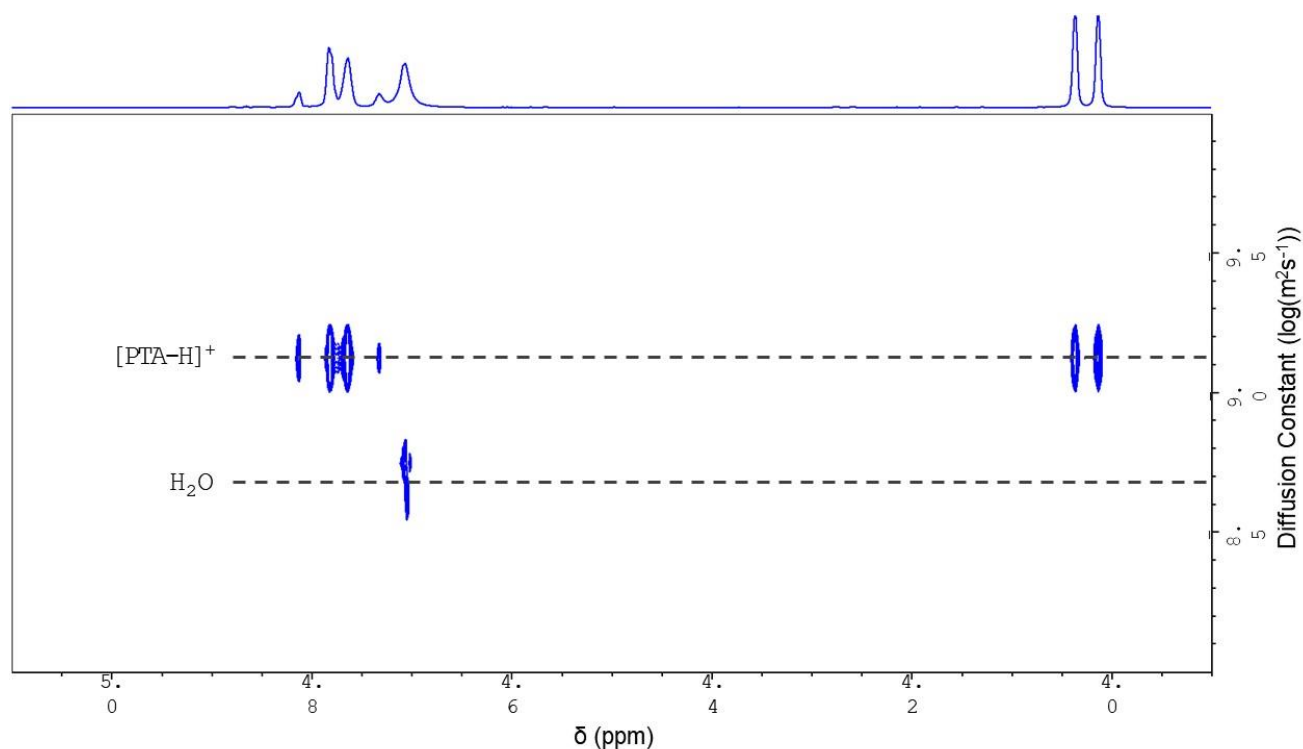

**Figure S23.** Two-dimensional  $^1\text{H}$ -DOSY NMR projection of compound  $[\text{PTA-H}]^+\cdot[\text{GaCl}_4]^-$  (**1**) in  $\text{D}_2\text{O}$  processed using TopSpin 3.6.5 (peaks for  $[\text{PTA-H}]^+$  and  $\text{H}_2\text{O}$  appeared in the range -8.5 and -9.5  $\text{Log}(\text{m}^2\text{s}^{-1})$ ).

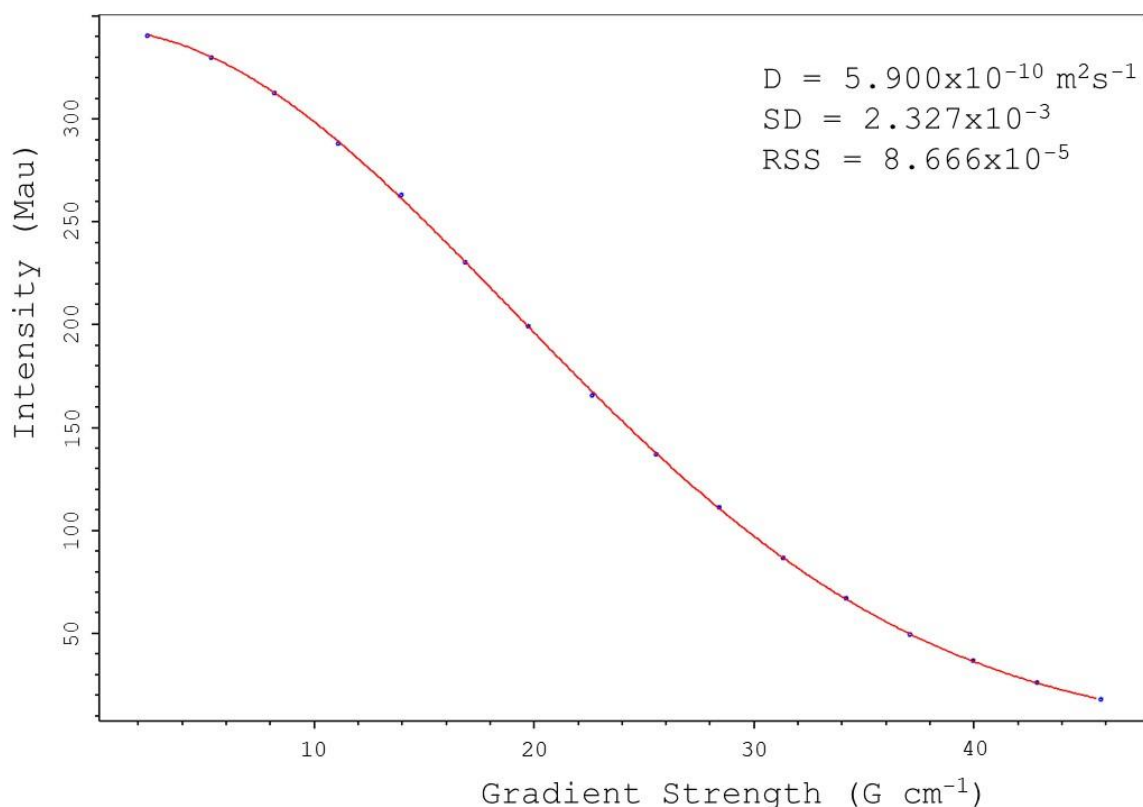

**Figure S24.** Plot of the intensity of the phosphor-coupled doublet of  $[\text{PTA-H}]^+$  in  $[\text{PTA-H}]^+\cdot[\text{GaCl}_4]^-$  (**1**) as a function of varied gradient strength over the 16 increments of the DOSY experiment. The datapoints were fit to equation 1 using the T1/T2 function in the dynamics module in TopSpin 3.6.5. (upper right: diffusion constant (D), alongside the standard deviation (SD) and the root sum of squares (RSS) for the fitting).



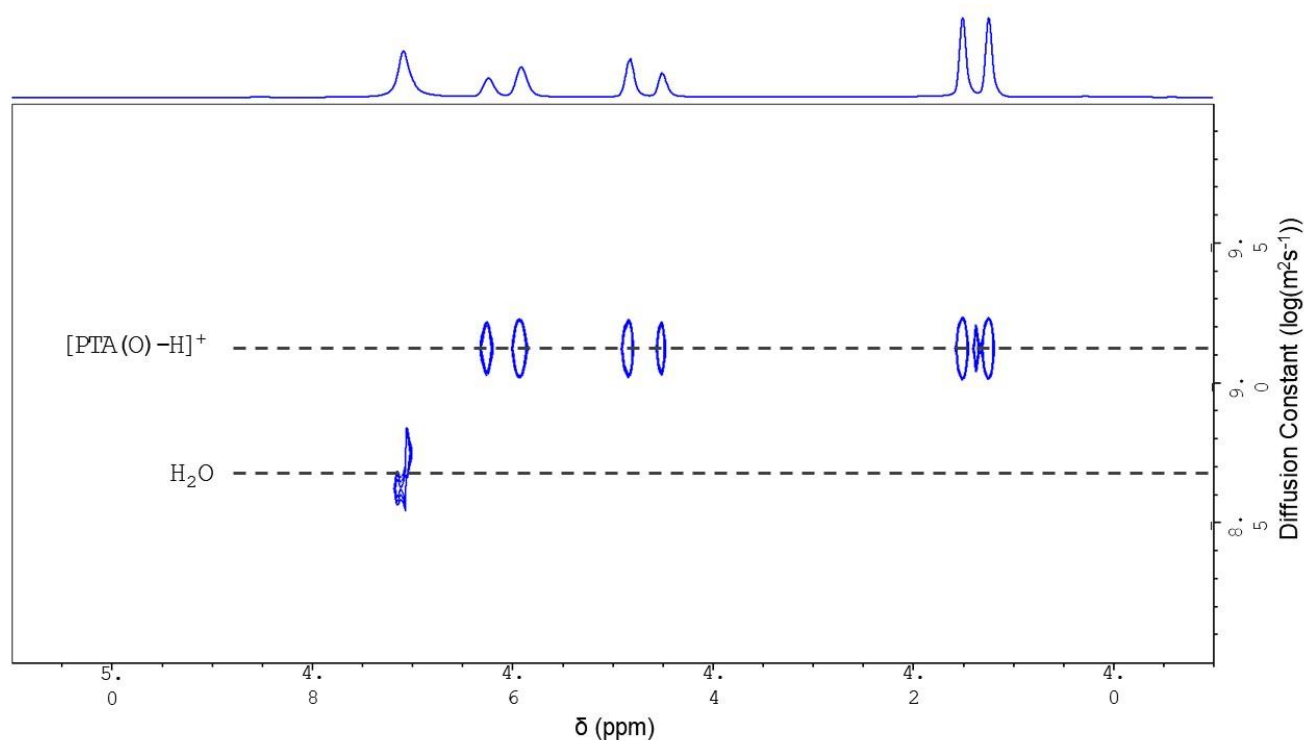

**Figure S25.** Two-dimensional  $^1\text{H}$ -DOSY NMR projection of compound  $[\text{PTA}(\text{O})-\text{H}][\text{GaCl}_4]$  (**2**) in  $\text{D}_2\text{O}$  processed using TopSpin 3.6.5 (peaks for  $[\text{PTA}(\text{O})-\text{H}]^+$  and  $\text{H}_2\text{O}$  appeared in the range -8.5 and -9.5  $\text{Log}(\text{m}^2\text{s}^{-1})$ ).

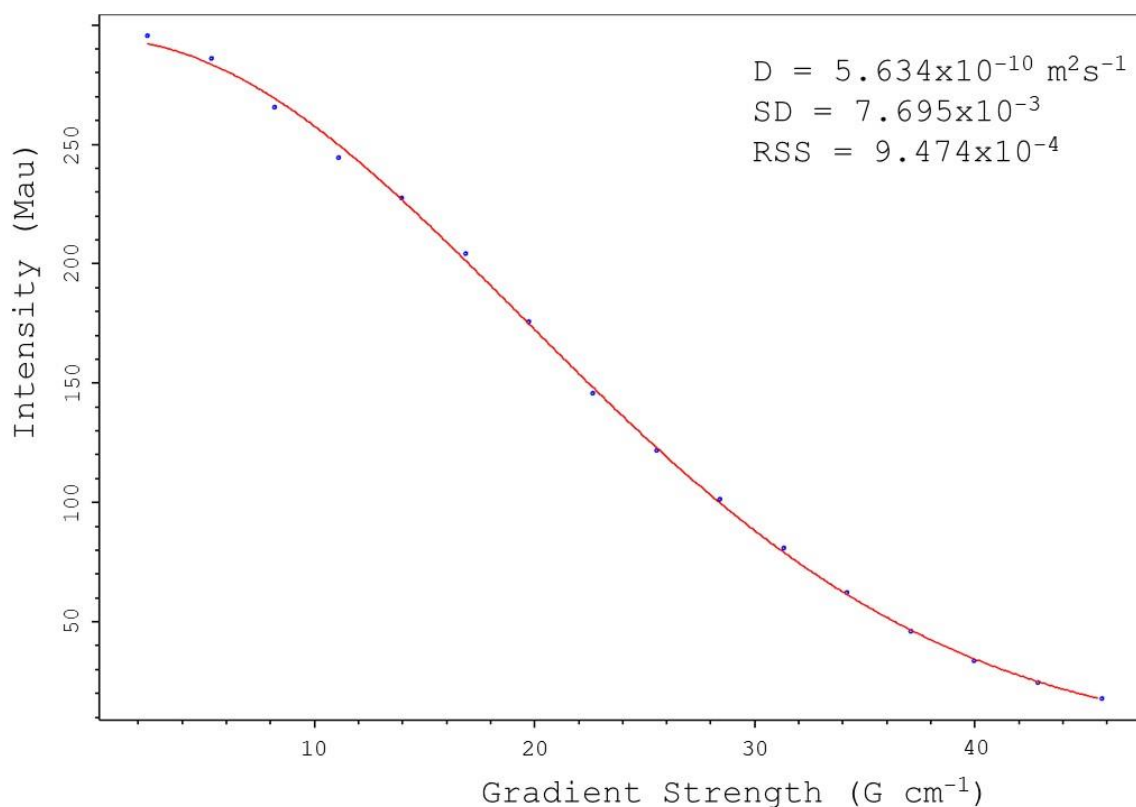

**Figure S26.** Plot of the intensity of the phosphor-coupled doublet of  $[\text{PTA}(\text{O})-\text{H}]^+$  in  $[\text{PTA}(\text{O})-\text{H}][\text{GaCl}_4]$  (**2**) as a function of varied gradient strength over the 16 increments of the DOSY experiment. The datapoints were fit to equation 1 using the T1/T2 function in the dynamics module in TopSpin 3.6.5. (upper right: diffusion constant (D), alongside the standard deviation (SD) and the root sum of squares (RSS) for the fitting).

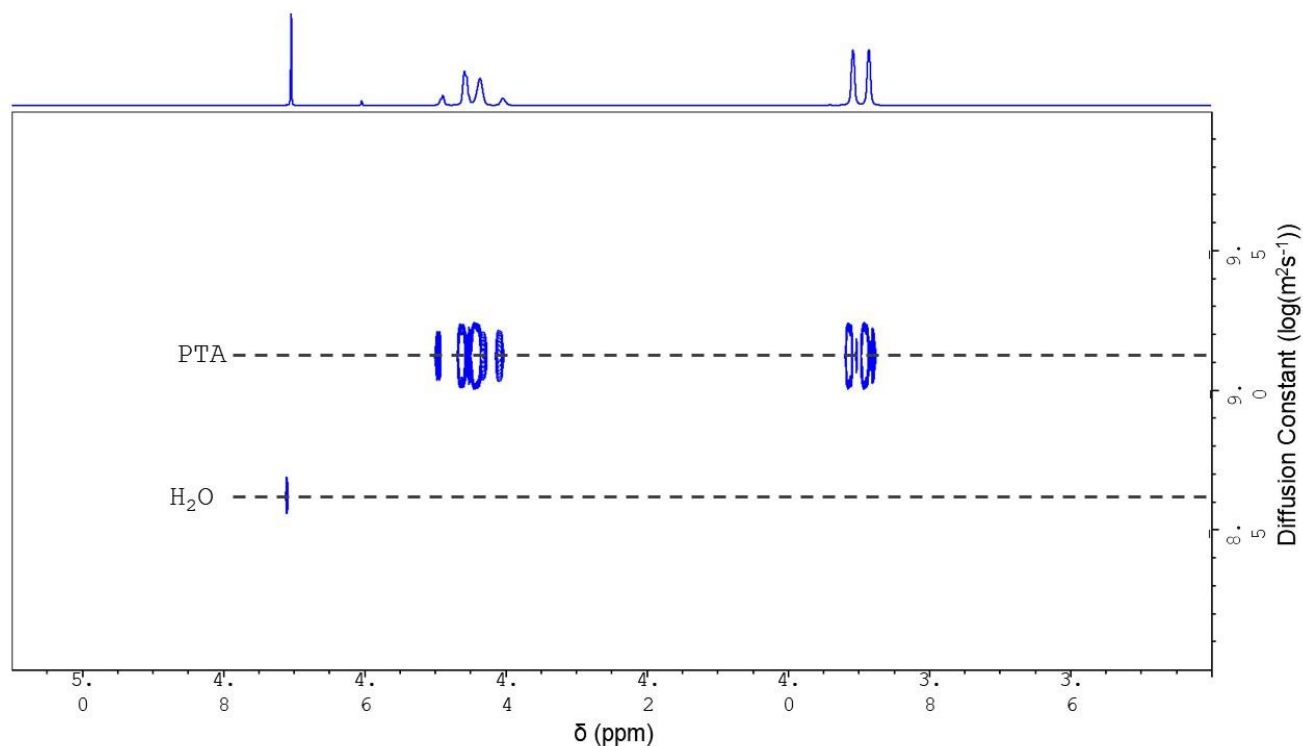

**Figure S27.** Two-dimensional <sup>1</sup>H-DOSY NMR projection of PTA (free ligand) in D<sub>2</sub>O processed using TopSpin 3.6.5 (peaks for PTA and H<sub>2</sub>O appeared in the range -8.5 and -9.5 Log(m<sup>2</sup>s<sup>-1</sup>)).

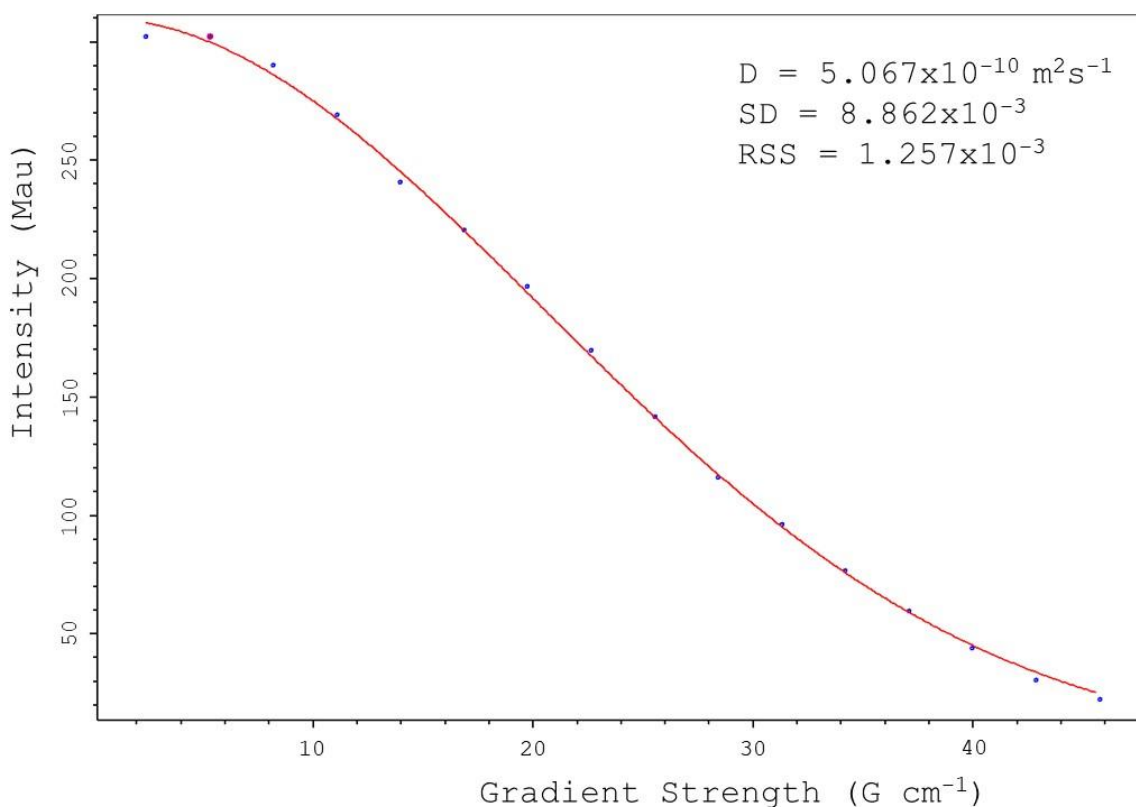

**Figure S28.** Plot of the intensity of the phosphor-coupled doublet of PTA (free ligand) as a function of varied gradient strength over the 16 increments of the DOSY experiment. The datapoints were fit to equation 1 using the T1/T2 function in the dynamics module in TopSpin 3.6.5. (upper right: diffusion constant (D), alongside the standard deviation (SD) and the root sum of squares (RSS) for the fitting).

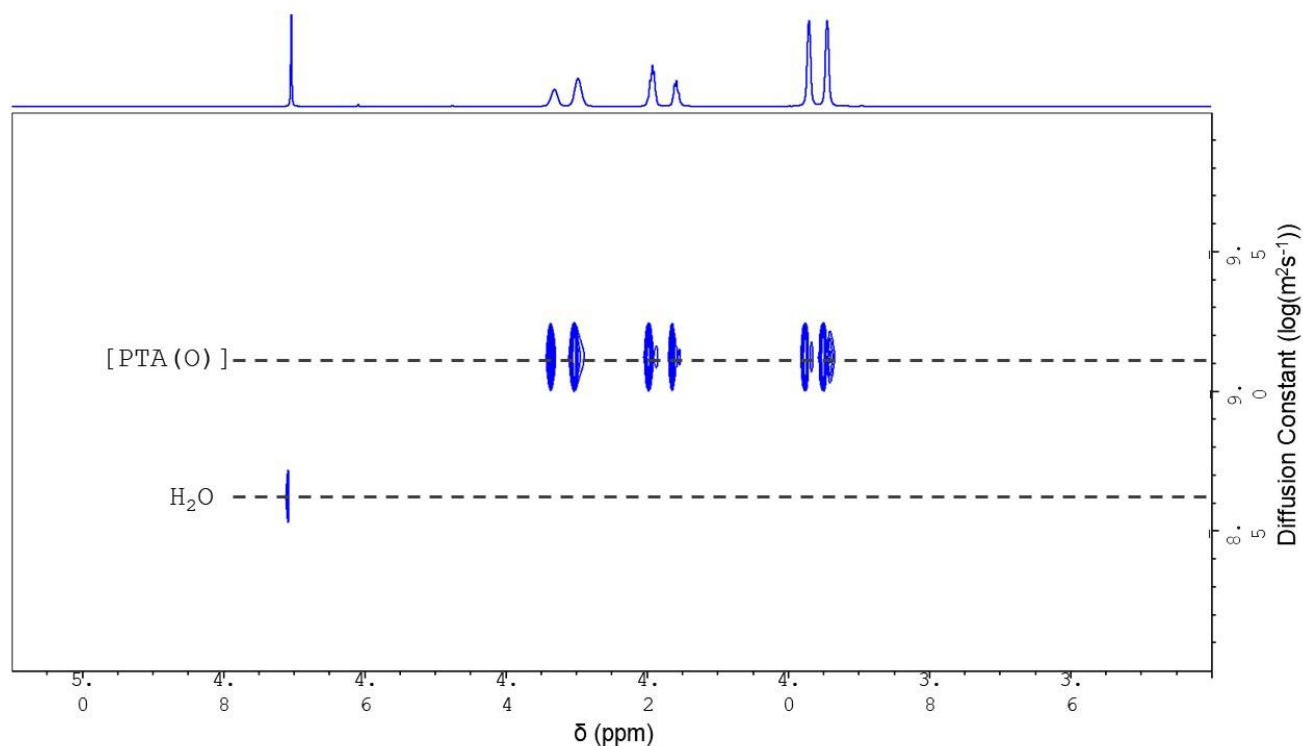

**Figure S29.** Two-dimensional  $^1\text{H}$ -DOSY NMR projection of [PTA(O)] (free ligand) in  $\text{D}_2\text{O}$  processed using TopSpin 3.6.5 (peaks for PTA and  $\text{H}_2\text{O}$  appeared in the range  $-8.5$  and  $-9.5 \text{ Log}(\text{m}^2\text{s}^{-1})$ )).

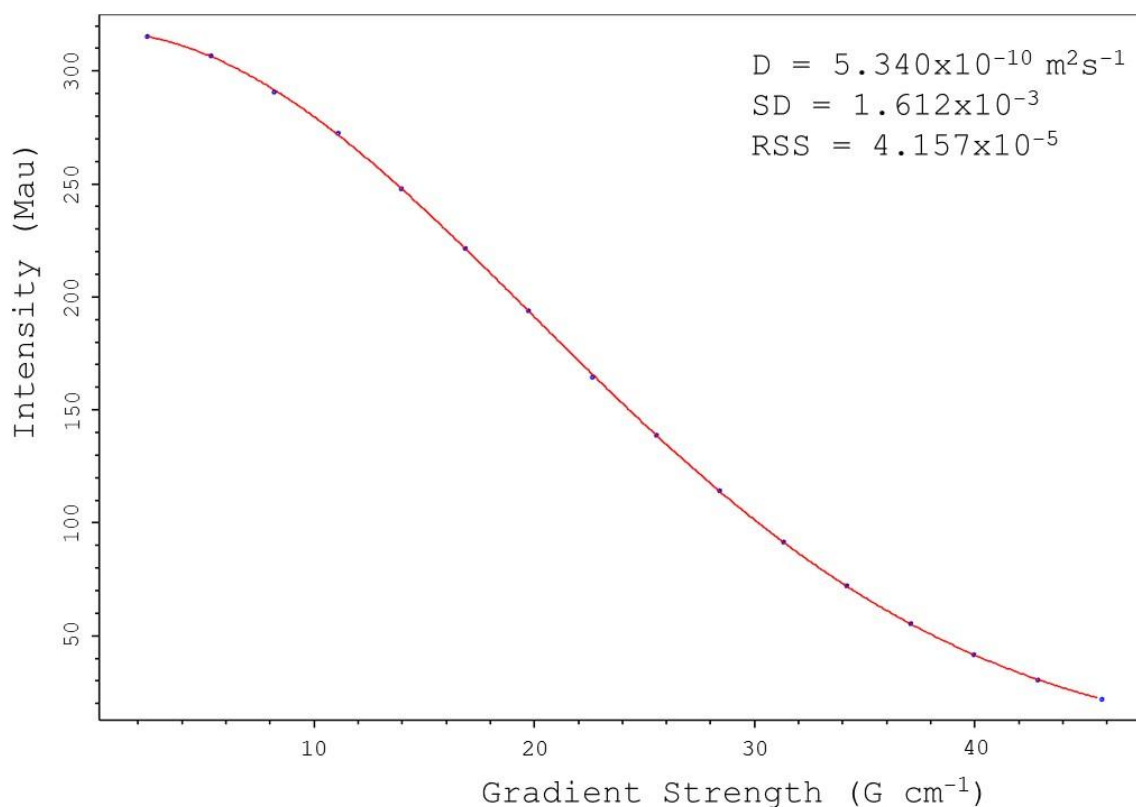

**Figure S30.** Plot of the intensity of the phosphor-coupled doublet of [PTA(O)] (free ligand) as a function of varied gradient strength over the 16 increments of the DOSY experiment. The datapoints were fit to equation 1 using the T1/T2 function in the dynamics module in TopSpin 3.6.5. (upper right: diffusion constant (D), alongside the standard deviation (SD) and the root sum of squares (RSS) for the fitting).

#### **4. Inductively coupled plasma mass spectrometry (ICP-MS): general information and measurements for compounds 1 and 2.**

All analytical chemicals were of trace analysis grade or equivalent. For the preparation and analysis of samples, deionized water (conductivity  $\leq 0.5 \mu\text{S}$ ), ultra-pure concentrated (65%) nitric acid and multi-elemental standards (for calibration of the ICP-MS spectrometer) were used; all volumetric flasks were polymethyl pentene (PMP), polypropylene (PP) Class A or equivalent quality polymer. Samples of compounds [PTA-H]•[GaCl<sub>4</sub>] (**1**) and [PTA(O)-H]•[GaCl<sub>4</sub>] (**2**) and all solutions prepared from them were stored at room temperature. All sample preparation steps and measurements were performed at the London Metallomics Facility (King's College London, KCL), under GMP settings. Preparation of the samples was performed as follows: dried samples of **1** (1.31 mg) and **2** (1.09 mg) were transferred into a Teflon dish, quenched with 2 mL of a 2% HNO<sub>3</sub> aqueous solution and were subjected to mineralization by microwave digestion (30 min). All samples were spiked with germanium to obtain a concentration of 10  $\mu\text{g Ge/L}$  in all samples to act as an internal standard to correct for matrix differences and/or instrumental drift. All measurements were conducted on a Thermo Fisher iCAP TQ ICP-MS in Dynamic Reaction Cell mode (DRC) with oxygen gas. The introduction system to the instrument was a Cetac ASX-520 autosampler coupled to a meinhard glass nebulizer that was fitted to a quartz cyclonic spray chamber. The typical settings used for ICP-QMS measurements are presented in Table S1. Data reduction involved the normalization of raw intensities using internal standard measurements of <sup>72</sup>Ge and blank correcting this signal by removing the average analyte intensity of blank measurements. Finally, external standardization was applied using an eight-point calibration curve to convert the corrected intensities into concentration measurements (see Table S2). The calibration curve for both P and Ga revealed a good linearity over the whole range of concentrations (0.10-1000  $\mu\text{g/L}$ ), with determination coefficients  $\geq 0.999$ . Three blank replicates, consisting of 2% HNO<sub>3</sub> in deionized water, were performed to calculate the limit of quantitation (LOQ).

**Table S1.** Typical settings used for ICP-QMS measurements.

---

| <b>Thermo Fisher iCAP TQ ICP-QMS</b> |                                |
|--------------------------------------|--------------------------------|
| RF Power                             | 1500 W                         |
| Ar plasma gas flow                   | 18 L min <sup>-1</sup>         |
| Ar auxiliary gas flow                | 1.2 L min <sup>-1</sup>        |
| Nebuliser gas flow                   | 1.0 L min <sup>-1</sup>        |
| CRC operation mode                   | DRC (O <sub>2</sub> )          |
| Oxygen DRC gas flow                  | 0.33 L min <sup>-1</sup>       |
| <b>Method acquisition</b>            |                                |
| Scanning mode                        | Peak-hopping                   |
| Dwell time                           | 100 ms amu <sup>-1</sup>       |
| Sweeps per reading                   | 50                             |
| Readings per replicate               | 1                              |
| Replicates per reading               | 5                              |
| Sample uptake rate                   | ~130 $\mu$ L min <sup>-1</sup> |

---

**Table S2.** Results of content of [Ga] and [P] elements in **1** and **2** compounds determined via ICP-MS.

| <b>COMPOUND</b>    | <b><sup>31</sup>P (<math>\mu</math>g/L)</b> | <b><sup>31</sup>P (RSD)</b> | <b><sup>71</sup>Ga (<math>\mu</math>g/L)</b> | <b><sup>71</sup>Ga (RSD)</b> | <b>P (mg/L)</b> | <b>Ga (mg/L)</b> |
|--------------------|---------------------------------------------|-----------------------------|----------------------------------------------|------------------------------|-----------------|------------------|
| <b>1</b> (1.31 mg) | 54444.22                                    | 3.57                        | 115735.50                                    | 3.70                         | 54.44           | 115.74           |
| <b>2</b> (1.09 mg) | 41884.26                                    | 2.83                        | 90654.54                                     | 3.11                         | 41.88           | 90.65            |

---

## 5. Tests of stability in aqueous solution for compounds [PTA-H]•[GaCl<sub>4</sub>] (1) and [PTA(O)-H]•[GaCl<sub>4</sub>] (2)

To test the stability of compounds **1** and **2**, the solutions of each sample in D<sub>2</sub>O were prepared on air, maintained at room temperature and monitored over time by <sup>1</sup>H and <sup>71</sup>Ga NMR spectroscopy using an Avance III HD spectrometer (operating at 400.13 and 122.03 MHz, respectively).

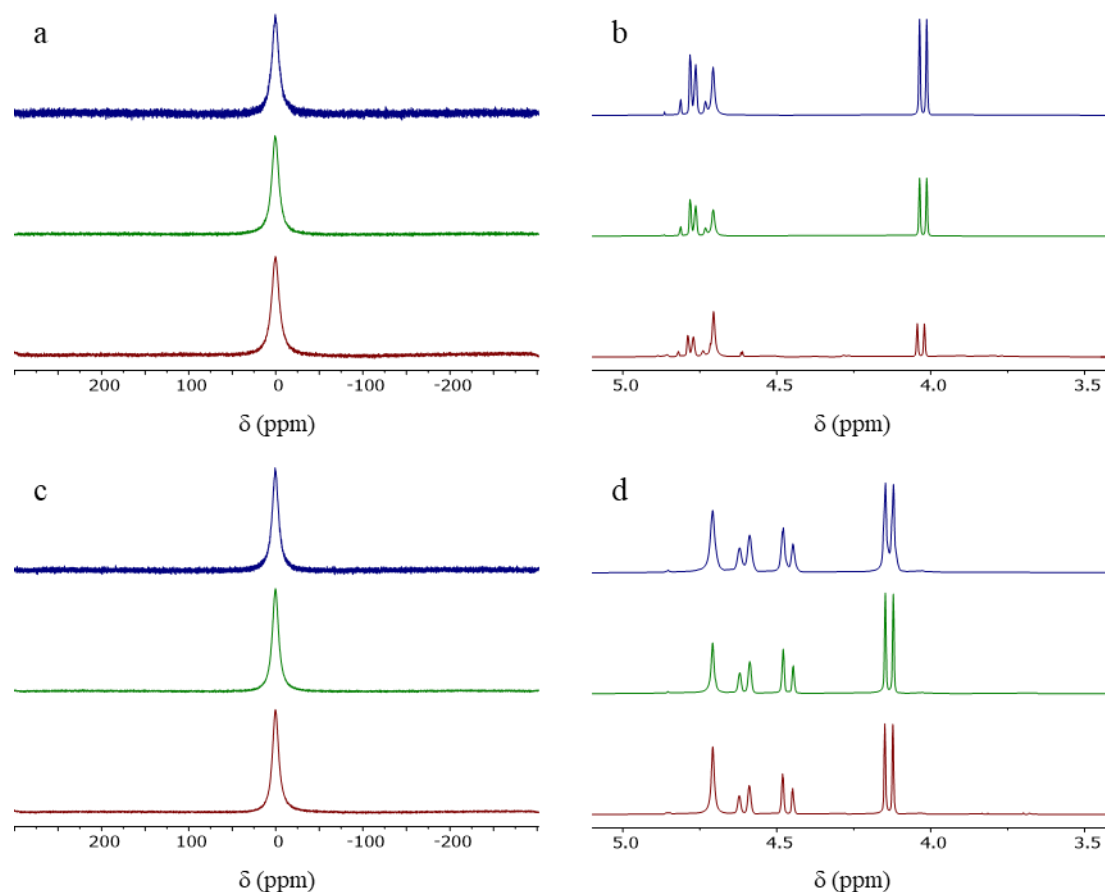

**Figure S31.** <sup>71</sup>Ga (a) and <sup>1</sup>H NMR spectra (b) of **1** and <sup>71</sup>Ga (c) and <sup>1</sup>H NMR spectra (d) of **2** in D<sub>2</sub>O recorded at t= 0 (blue), one day later (green) and one month later (red). <sup>71</sup>Ga spectra were recorded with a transmitter offset frequency of 0.0 ppm and a spectral width of 600 ppm. To improve clarity, each stacked plot was normalised to the height of the largest peak. <sup>1</sup>H spectra were run with a transmitter frequency offset of 2.5 ppm and a spectral width of 7 ppm. Either <sup>71</sup>Ga and <sup>1</sup>H NMR spectral widths shown in the figure were expanded in the region where signals were detected.

## 6. CSD search

Mean P-C distance in PTA 1.843(17) on 3366 P-C bonds in 680 hits.

Mean C-N distance around not protonated nitrogen atom in monoprotonated PTA 1.461(9) (534 bonds in 54 hits).

Mean C-N distance around protonated nitrogen atom in monoprotonated PTA 1.55(2) (267 bonds in 54 hits).

## 7. Additional drawing of X-Ray Structures

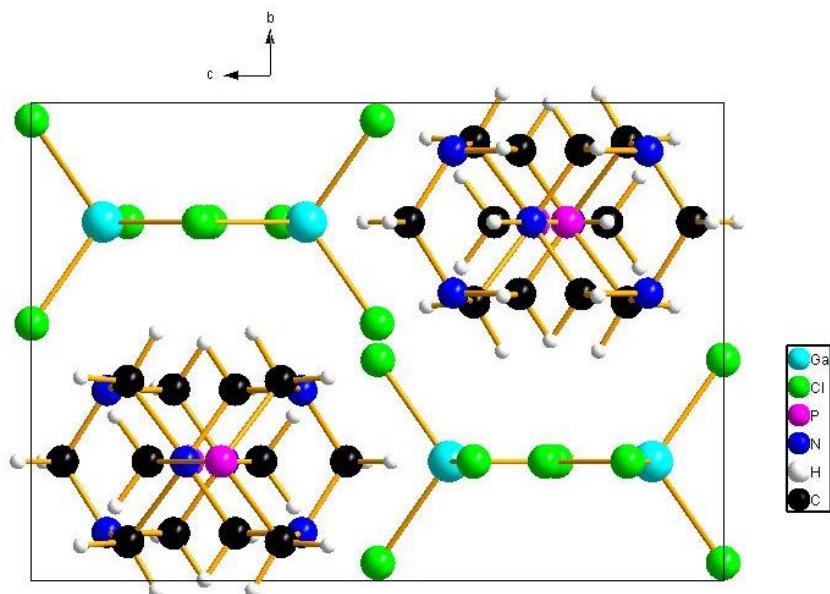

**Figure S32.** Packing diagram of [PTA-H]•[GaCl<sub>4</sub>] (**1**) along *a* axis.

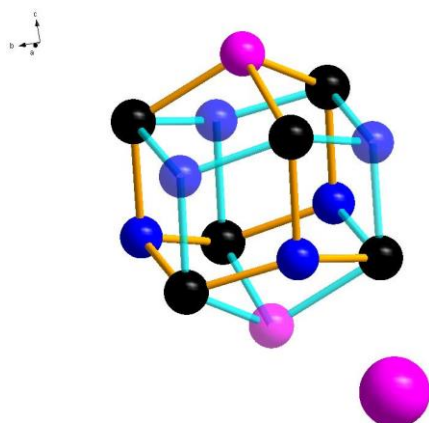

**Figure S33.** Molecular structure of [PTA-H]•[I] (**3**) showing the two disordered [PTA-H]<sup>+</sup> molecules in the same crystallographic site. Empirical formula: C<sub>6</sub>H<sub>13</sub>IN<sub>3</sub>P; Formula weight: 285.06; Space group: Monoclinic; Space group *C2/m*; Cell dimension: 8.0895(6)Å, 9.0090(7) Å, 6.7561(6)Å, 98.987(3); Volume: 486.33(7) Å<sup>3</sup>; Z=2;

## 8. Fingerprint plots for compounds [PTA-H]•[GaCl<sub>4</sub>] (1), [PTA(O)-H]•[GaCl<sub>4</sub>] (2) and [PTA(O)-H]•[I] (4)

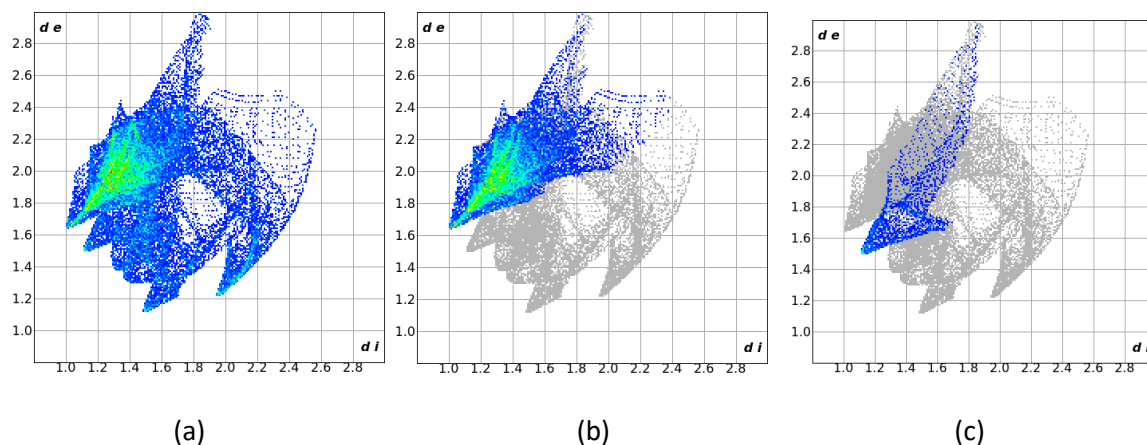

**Figure S34.** (a) Fingerprint plot for [PTA-H]•[GaCl<sub>4</sub>] (1), (b) with highlight of the [PTA-H]<sup>+</sup> with Cl atoms of neighbor anions and (c) with N atoms of neighbor cations.

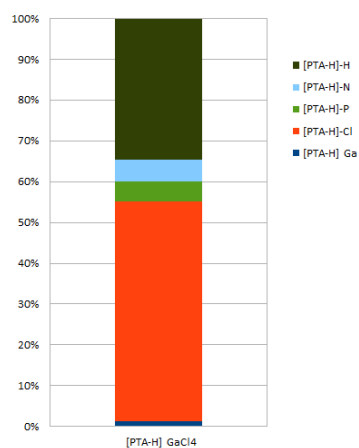

**Figure S35.** Percentage distribution of different interactions present in [PTA-H]•[GaCl<sub>4</sub>] (1) as obtained from fingerprint plots.



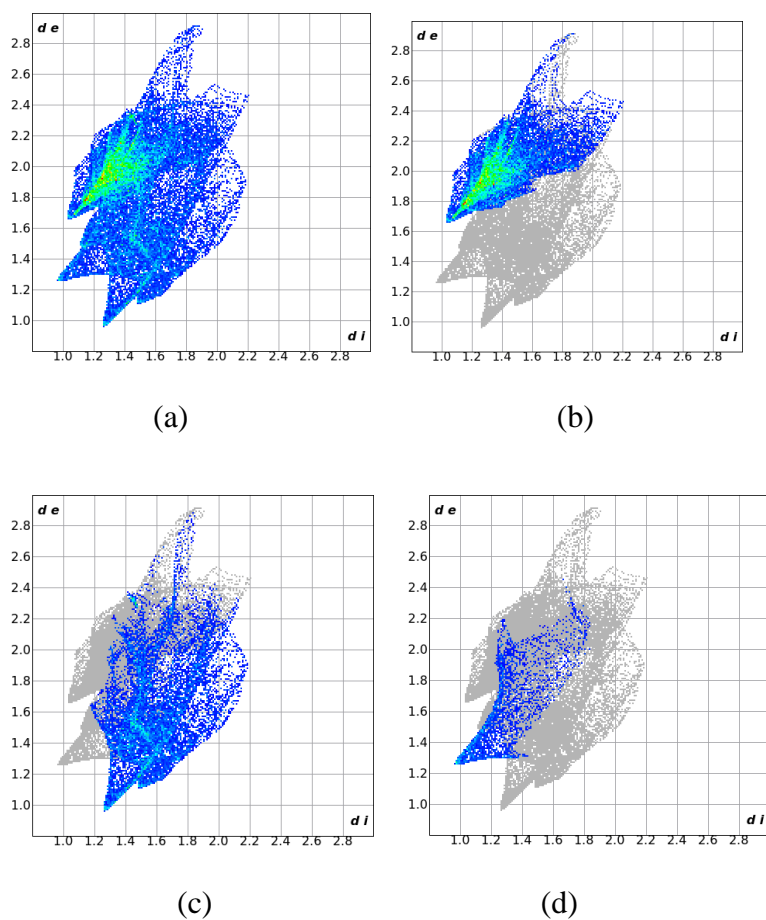

**Figure S36.** (a) Fingerprint plot for  $[\text{PTA}(\text{O})\text{-H}]\cdot[\text{GaCl}_4]$  (**2**), (b) with highlight of the  $[\text{PTA}(\text{O})\text{-H}]^+$  with Cl atoms of neighbor anions, (c) with H atoms of neighbor cations and (d) with O atoms of neighbor cations.

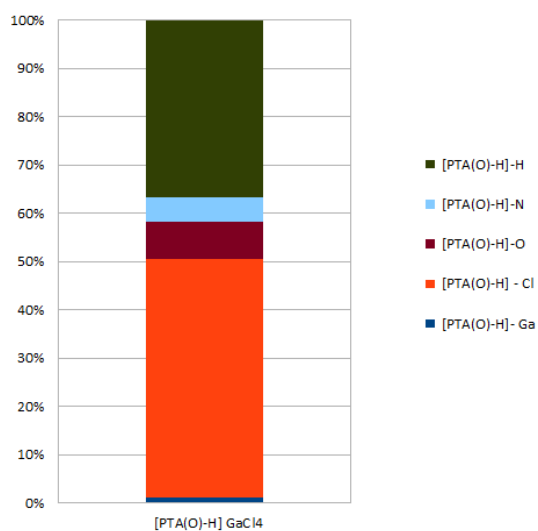

**Figure S37.** Percentage distribution of different interactions present in  $[\text{PTA}(\text{O})\text{-H}]\cdot[\text{GaCl}_4]$  (**2**), as obtained from fingerprint plots.

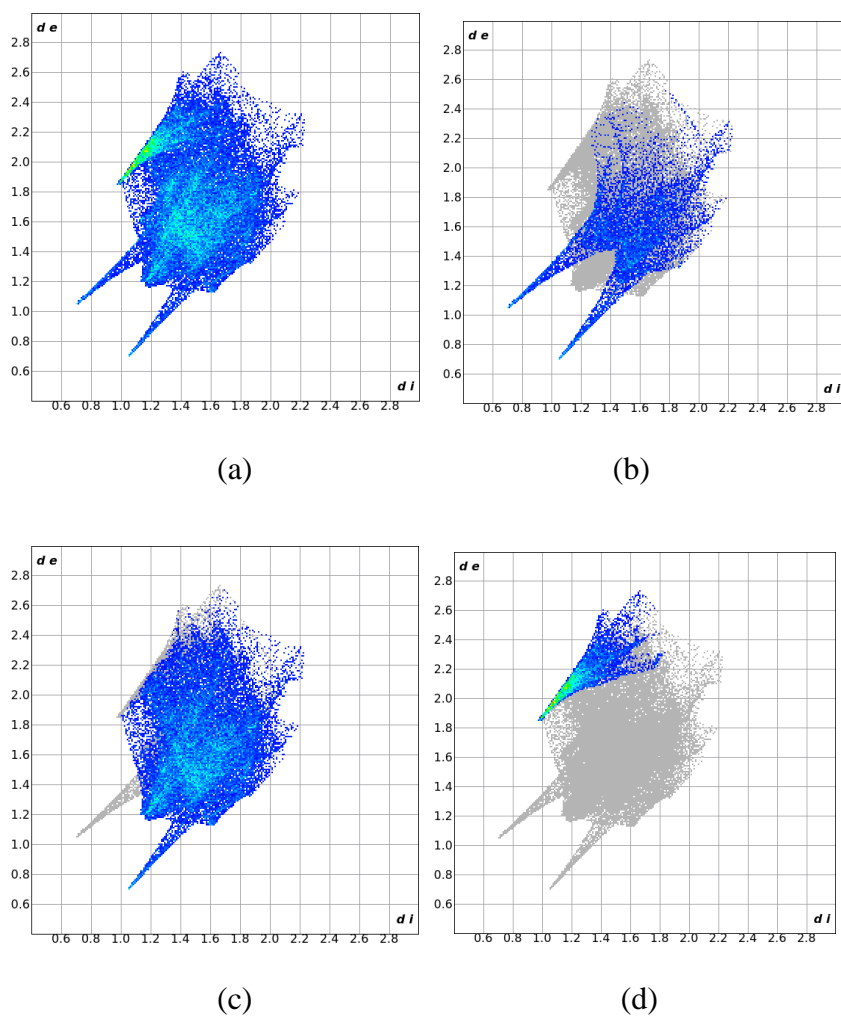

**Figure S38.** (a) Fingerprint plot for [PTA(O)-H]•[I] (**4**), (b) with highlight of the [PTA(O)-H]<sup>+</sup> with O atoms of neighbor cations, (c) with H atoms of neighbor cations and (d) with I atoms.

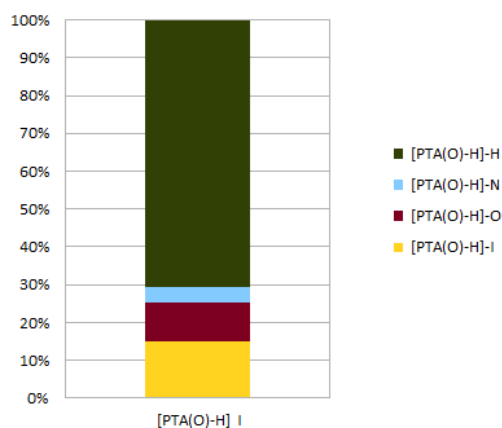

**Figure S39.** Percentage distribution of different interactions present in [PTA(O)-H]•[I] (**4**) as obtained from fingerprint plots.

## 9. DFT calculations and cartesian coordinates of optimized compounds

**Table S3.** Free energy values calculated by DFT for the formation of [(PTA)GaX<sub>3</sub>] and [(PTA-H)GaX<sub>3</sub>] coordination compounds (X= Br or I).

| Ga-phosphine-halide adduct formation                      | Calculated free energy (kcal/mol) |
|-----------------------------------------------------------|-----------------------------------|
| PTA + GaBr <sub>3</sub> → [(PTA)GaBr <sub>3</sub> ]       | $\Delta G = -15.4$                |
| (PTA-H) + GaBr <sub>3</sub> → [(PTA-H)GaBr <sub>3</sub> ] | $\Delta G = +2.0$                 |
| PTA + GaI <sub>3</sub> → [(PTA)GaI <sub>3</sub> ]         | $\Delta G = -13.4$                |
| (PTA-H) + GaI <sub>3</sub> → [(PTA-H)GaI <sub>3</sub> ]   | $\Delta G = +3.5$                 |

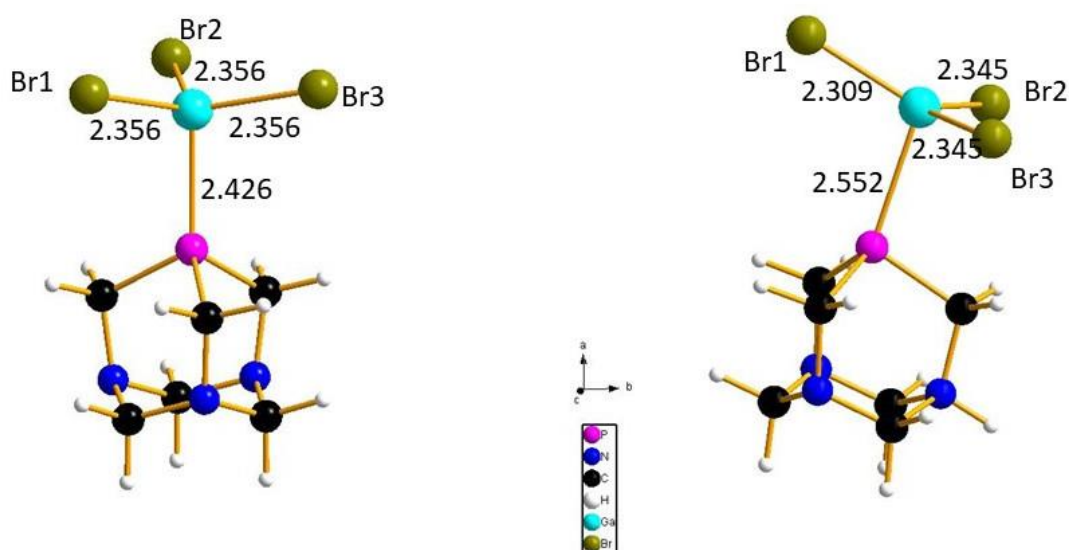

**Figure S40.** Optimized structures of [(PTA)GaBr<sub>3</sub>] (left) and [(PTA-H)GaBr<sub>3</sub>] (right) coordination complexes.

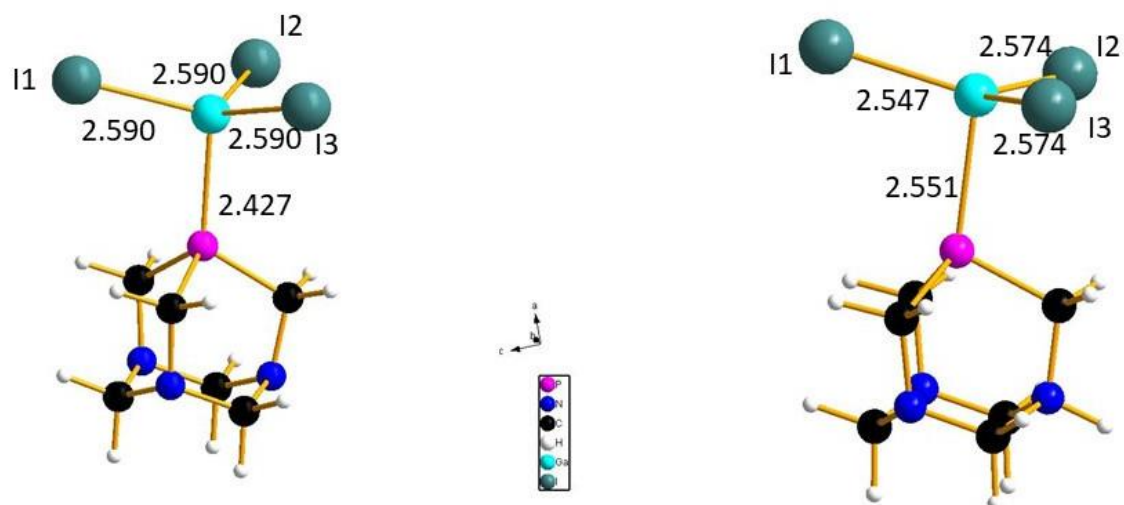

**Figure S41.** Optimized structures of [(PTA)GaI<sub>3</sub>] (left) and [(PTA-H)GaI<sub>3</sub>] (right) coordination complexes.

## Cartesian coordinates of optimized compounds

Structure: [(PTA)GaCl<sub>3</sub>]

| List Sy | X         | Y         | Z         |
|---------|-----------|-----------|-----------|
| 1 P     | 8.182895  | 2.068498  | 9.410750  |
| 2 N     | 5.546024  | 2.068465  | 8.599119  |
| 3 N     | 6.062474  | 3.302298  | 10.673158 |
| 4 C     | 6.900255  | 2.068571  | 8.036443  |
| 5 H     | 7.047397  | 2.951819  | 7.406761  |
| 6 C     | 7.495922  | 3.491840  | 10.428647 |
| 7 H     | 8.036724  | 3.548803  | 11.378683 |
| 8 H     | 7.666727  | 4.431811  | 9.894265  |
| 9 C     | 5.288830  | 3.266594  | 9.418734  |
| 10 H    | 5.511013  | 4.162132  | 8.830620  |
| 11 H    | 4.225258  | 3.277876  | 9.676820  |
| 12 C    | 5.790704  | 2.068255  | 11.432493 |
| 13 H    | 6.388009  | 2.068244  | 12.349254 |
| 14 H    | 4.731965  | 2.068111  | 11.709969 |
| 15 N    | 6.062774  | 0.834412  | 10.672962 |
| 16 H    | 7.047425  | 1.185427  | 7.406620  |
| 17 C    | 7.496214  | 0.645060  | 10.428696 |
| 18 H    | 8.036941  | 0.588316  | 11.378789 |
| 19 H    | 7.667254  | -0.294918 | 9.894404  |
| 20 C    | 5.289182  | 0.870139  | 9.418519  |
| 21 H    | 5.511679  | -0.025257 | 8.830311  |
| 22 H    | 4.225604  | 0.858508  | 9.676573  |
| 23 Ga   | 10.540971 | 2.068150  | 8.825784  |
| 24 Cl   | 11.532996 | 2.068156  | 10.793151 |
| 25 Cl   | 10.759333 | 3.928137  | 7.665147  |
| 26 Cl   | 10.758496 | 0.207654  | 7.665778  |

Sum of electronic and thermal Free Energies = -4044.892389

Structure: [(PTA-H)GaCl<sub>3</sub>]<sup>+</sup>

| List Sy | X         | Y         | Z         |
|---------|-----------|-----------|-----------|
| 1 P     | 8.255600  | 2.068581  | 9.621578  |
| 2 N     | 5.665944  | 2.068423  | 8.560982  |
| 3 N     | 6.005499  | 3.287925  | 10.669565 |
| 4 C     | 7.116355  | 2.068555  | 8.133353  |
| 5 H     | 7.306561  | 2.955235  | 7.521713  |
| 6 C     | 7.459843  | 3.491438  | 10.555984 |
| 7 H     | 7.897399  | 3.559870  | 11.555841 |
| 8 H     | 7.672415  | 4.433829  | 10.042306 |
| 9 C     | 5.322715  | 3.331817  | 9.420764  |
| 10 H    | 5.604847  | 4.204245  | 8.827339  |
| 11 H    | 4.239237  | 3.306854  | 9.562528  |
| 12 C    | 5.653102  | 2.068249  | 11.417848 |
| 13 H    | 6.173310  | 2.068237  | 12.377004 |
| 14 H    | 4.576017  | 2.068141  | 11.608078 |
| 15 N    | 6.005720  | 0.848736  | 10.669406 |
| 16 H    | 7.306706  | 1.181938  | 7.521667  |
| 17 C    | 7.460091  | 0.645501  | 10.555823 |
| 18 H    | 7.897642  | 0.577043  | 11.555680 |
| 19 H    | 7.672860  | -0.296785 | 10.042037 |
| 20 C    | 5.322926  | 0.804866  | 9.420626  |
| 21 H    | 5.605186  | -0.067448 | 8.827095  |
| 22 H    | 4.239446  | 0.829656  | 9.562406  |
| 23 Ga   | 10.617829 | 2.068181  | 8.639738  |
| 24 Cl   | 11.939611 | 2.068355  | 10.345444 |
| 25 Cl   | 10.297926 | 3.917865  | 7.507160  |
| 26 Cl   | 10.297205 | 0.217878  | 7.508297  |
| 27 H    | 5.073664  | 2.068420  | 7.723074  |

Sum of electronic and thermal Free Energies = -4045.226342

**Structure: GaCl<sub>3</sub>**

| List Sy | X         | Y        | Z         |
|---------|-----------|----------|-----------|
| 1 Ga    | 11.295878 | 2.068494 | 8.866983  |
| 2 Cl    | 11.572200 | 2.068070 | 10.993460 |
| 3 Cl    | 11.176657 | 3.925312 | 7.801023  |
| 4 Cl    | 11.138684 | 0.211525 | 7.806140  |

Sum of electronic and thermal Free Energies = -3303.577082

**Structure: PTA**

| List Sy | X        | Y         | Z         |
|---------|----------|-----------|-----------|
| 1 P     | 8.166901 | 2.068350  | 9.238069  |
| 2 N     | 5.385984 | 2.068350  | 8.633901  |
| 3 N     | 6.040225 | 3.303213  | 10.669997 |
| 4 C     | 6.717560 | 2.068350  | 8.007989  |
| 5 H     | 6.805866 | 2.948044  | 7.359140  |
| 6 C     | 7.459315 | 3.466761  | 10.314029 |
| 7 H     | 8.050347 | 3.538530  | 11.234860 |
| 8 H     | 7.585233 | 4.418290  | 9.783580  |
| 9 C     | 5.186529 | 3.261878  | 9.472187  |
| 10 H    | 5.368219 | 4.158308  | 8.869918  |
| 11 H    | 4.140763 | 3.274344  | 9.800255  |
| 12 C    | 5.819072 | 2.068350  | 11.440631 |
| 13 H    | 6.476884 | 2.068350  | 12.316086 |
| 14 H    | 4.780251 | 2.068350  | 11.790237 |
| 15 N    | 6.040225 | 0.833487  | 10.669997 |
| 16 H    | 6.805866 | 1.188656  | 7.359140  |
| 17 C    | 7.459315 | 0.669939  | 10.314029 |
| 18 H    | 8.050347 | 0.598170  | 11.234860 |
| 19 H    | 7.585233 | -0.281590 | 9.783580  |
| 20 C    | 5.186529 | 0.874822  | 9.472187  |
| 21 H    | 5.368219 | -0.021608 | 8.869918  |
| 22 H    | 4.140763 | 0.862356  | 9.800255  |

Sum of electronic and thermal Free Energies = -741.289873

**Structure: [PTA-H]<sup>+</sup>**

| List Sy | X        | Y         | Z         |
|---------|----------|-----------|-----------|
| 1 P     | 8.281376 | 2.068631  | 9.394403  |
| 2 N     | 5.542248 | 2.068392  | 8.587083  |
| 3 N     | 6.058535 | 3.287980  | 10.656538 |
| 4 C     | 6.958255 | 2.068561  | 8.040119  |
| 5 H     | 7.068747 | 2.953429  | 7.406345  |
| 6 C     | 7.500461 | 3.470363  | 10.402231 |
| 7 H     | 8.020572 | 3.542266  | 11.362240 |
| 8 H     | 7.659341 | 4.423539  | 9.887250  |
| 9 C     | 5.272642 | 3.327957  | 9.472666  |
| 10 H    | 5.501632 | 4.200981  | 8.857112  |
| 11 H    | 4.204201 | 3.301506  | 9.704334  |
| 12 C    | 5.771000 | 2.068281  | 11.429191 |
| 13 H    | 6.372744 | 2.068298  | 12.339460 |
| 14 H    | 4.713783 | 2.068160  | 11.712165 |
| 15 N    | 6.058781 | 0.848713  | 10.656423 |
| 16 H    | 7.068927 | 1.183774  | 7.406263  |
| 17 C    | 7.500745 | 0.666646  | 10.402097 |
| 18 H    | 8.020870 | 0.594753  | 11.362099 |
| 19 H    | 7.659817 | -0.286447 | 9.887023  |
| 20 C    | 5.272897 | 0.808690  | 9.472546  |
| 21 H    | 5.502062 | -0.064230 | 8.856909  |
| 22 H    | 4.204451 | 0.834904  | 9.704218  |
| 23 H    | 4.879766 | 2.068362  | 7.804763  |

Sum of electronic and thermal Free Energies = -741.652745

**Structure: PMe<sub>3</sub>**

| List Sy | X        | Y        | Z        |
|---------|----------|----------|----------|
| 1 P     | 6.741960 | 2.629722 | 5.537495 |
| 2 C     | 7.692366 | 2.634456 | 7.143604 |
| 3 C     | 7.643278 | 3.998645 | 4.644831 |
| 4 C     | 7.538300 | 1.154973 | 4.716214 |
| 5 H     | 7.385713 | 1.778224 | 7.753406 |
| 6 H     | 7.455368 | 3.543060 | 7.706852 |
| 7 H     | 8.777849 | 2.587512 | 6.990539 |
| 8 H     | 7.307123 | 4.040147 | 3.603515 |
| 9 H     | 8.732211 | 3.864554 | 4.658586 |
| 10 H    | 7.401261 | 4.960520 | 5.108691 |
| 11 H    | 7.198385 | 1.086086 | 3.677581 |
| 12 H    | 7.227141 | 0.237976 | 5.227311 |
| 13 H    | 8.634151 | 1.209373 | 4.725607 |

Sum of electronic and thermal Free Energies = -461.029867



**Structure: [(PMe<sub>3</sub>)GaCl<sub>3</sub>]**

| List Sy | X        | Y        | Z        |
|---------|----------|----------|----------|
| 1 Ga    | 4.512339 | 2.626502 | 5.382949 |
| 2 Cl    | 3.941844 | 1.082566 | 6.852028 |
| 3 Cl    | 4.014841 | 4.693913 | 5.970871 |
| 4 Cl    | 4.051294 | 2.124092 | 3.284695 |
| 5 P     | 6.931158 | 2.592930 | 5.447126 |
| 6 C     | 7.588951 | 2.984442 | 7.113437 |
| 7 C     | 7.674829 | 3.809942 | 4.294587 |
| 8 C     | 7.616656 | 0.955233 | 4.988222 |
| 9 H     | 7.205607 | 2.254594 | 7.831609 |
| 10 H    | 7.241113 | 3.976754 | 7.412972 |
| 11 H    | 8.683151 | 2.963343 | 7.119453 |
| 12 H    | 7.344850 | 3.588257 | 3.276077 |
| 13 H    | 8.767831 | 3.777780 | 4.339956 |
| 14 H    | 7.327639 | 4.812723 | 4.557789 |
| 15 H    | 7.285912 | 0.697586 | 3.978458 |
| 16 H    | 7.233616 | 0.199091 | 5.678812 |
| 17 H    | 8.710468 | 0.962499 | 5.023960 |

Sum of electronic and thermal Free Energies = -3764.638447

**Structure: [(PTA-H)AuCl]<sup>+</sup>**

| List Sy | X         | Y         | Z         |
|---------|-----------|-----------|-----------|
| 1 Au    | -0.019462 | -0.031645 | -0.076583 |
| 2 P     | 0.001160  | -0.037657 | 2.201386  |
| 3 Cl    | -0.041040 | -0.025569 | -2.398003 |
| 4 N     | 1.447010  | -0.073508 | 4.568194  |
| 5 N     | -0.715803 | -1.262823 | 4.584184  |
| 6 N     | -0.664327 | 1.205059  | 4.590000  |
| 7 C     | 1.644616  | -0.074177 | 3.113162  |
| 8 C     | -0.837909 | -1.439143 | 3.131603  |
| 9 C     | -0.778455 | 1.393315  | 3.138182  |
| 10 C    | 0.742277  | 1.137617  | 5.024642  |
| 11 C    | 0.692275  | -1.256289 | 5.018870  |
| 12 C    | -1.355743 | -0.016086 | 5.040127  |
| 13 H    | 2.202669  | -0.967530 | 2.813240  |
| 14 H    | 2.239650  | 0.796393  | 2.817407  |
| 15 H    | -1.895166 | -1.476749 | 2.848339  |
| 16 H    | -0.386213 | -2.390894 | 2.832318  |
| 17 H    | -1.833065 | 1.476937  | 2.854923  |
| 18 H    | -0.286893 | 2.326614  | 2.843610  |
| 19 H    | 0.759266  | 1.146994  | 6.119227  |
| 20 H    | 1.274924  | 2.023251  | 4.664414  |
| 21 H    | 0.708758  | -1.271553 | 6.113402  |
| 22 H    | 1.187427  | -2.161721 | 4.654393  |
| 23 H    | -1.360273 | -0.018538 | 6.134878  |
| 24 H    | -2.392960 | 0.006326  | 4.691555  |

Sum of electronic and thermal Free Energies = -1337.366403

**Structure: [(PTA)AuCl]**

| List Sy | X         | Y         | Z         |
|---------|-----------|-----------|-----------|
| 1 Au    | 0.028406  | -0.031110 | -0.074144 |
| 2 P     | -0.058610 | -0.034736 | 2.181664  |
| 3 Cl    | 0.142774  | -0.027622 | -2.355251 |
| 4 N     | 1.465916  | -0.066752 | 4.537241  |
| 5 N     | -0.691346 | -1.247497 | 4.589483  |
| 6 N     | -0.648224 | 1.189379  | 4.594733  |
| 7 C     | 1.617808  | -0.066211 | 3.030591  |
| 8 C     | -0.851342 | -1.441656 | 3.137429  |
| 9 C     | -0.801050 | 1.395271  | 3.143526  |
| 10 C    | 0.704478  | 1.209352  | 5.035458  |
| 11 C    | 0.659759  | -1.317240 | 5.030002  |
| 12 C    | -1.340363 | -0.018272 | 5.078052  |
| 13 H    | 2.172580  | -0.961605 | 2.736223  |
| 14 H    | 2.203818  | 0.810317  | 2.740000  |
| 15 H    | -1.915848 | -1.489131 | 2.890602  |
| 16 H    | -0.407531 | -2.394531 | 2.832970  |
| 17 H    | -1.863155 | 1.481630  | 2.896898  |
| 18 H    | -0.323603 | 2.333068  | 2.843134  |
| 19 H    | 0.766042  | 1.180632  | 6.126411  |
| 20 H    | 1.251038  | 2.073402  | 4.651015  |
| 21 H    | 0.722210  | -1.295412 | 6.121073  |
| 22 H    | 1.175425  | -2.198435 | 4.641817  |
| 23 H    | -1.327981 | -0.020813 | 6.171792  |
| 24 H    | -2.379062 | 0.000864  | 4.744469  |
| 25 H    | 2.397737  | -0.084182 | 4.967280  |

Sum of electronic and thermal Free Energies = -1337.701678

**Structure: AuCl**

| List Sy | X         | Y         | Z         |
|---------|-----------|-----------|-----------|
| 1 Au    | -0.000101 | -0.000566 | -0.007836 |
| 2 Cl    | -0.029410 | -0.165533 | -2.290013 |

Sum of electronic and thermal Free Energies = -596.006313

**Structure: [(PTA)GaBr<sub>3</sub>]**

| List Sy | X         | Y         | Z         |
|---------|-----------|-----------|-----------|
| 1 P     | 8.184112  | 2.067787  | 9.410456  |
| 2 N     | 5.548026  | 2.068461  | 8.598468  |
| 3 N     | 6.064604  | 3.301871  | 10.672740 |
| 4 C     | 6.902385  | 2.068550  | 8.035697  |
| 5 H     | 7.050153  | 2.952032  | 7.406512  |
| 6 C     | 7.498353  | 3.491021  | 10.428839 |
| 7 H     | 8.039190  | 3.546855  | 11.378884 |
| 8 H     | 7.669843  | 4.431003  | 9.894761  |
| 9 C     | 5.291417  | 3.266562  | 9.418107  |
| 10 H    | 5.514144  | 4.162074  | 8.830174  |
| 11 H    | 4.227775  | 3.278289  | 9.676054  |
| 12 C    | 5.792269  | 2.067889  | 11.431961 |
| 13 H    | 6.389245  | 2.067691  | 12.348939 |
| 14 H    | 4.733406  | 2.068145  | 11.709086 |
| 15 N    | 6.063936  | 0.833768  | 10.672611 |
| 16 H    | 7.049933  | 1.185444  | 7.405968  |
| 17 C    | 7.497667  | 0.644279  | 10.427939 |
| 18 H    | 8.038746  | 0.587291  | 11.377774 |
| 19 H    | 7.668850  | -0.295231 | 9.892935  |
| 20 C    | 5.290896  | 0.870134  | 9.417863  |
| 21 H    | 5.513038  | -0.025234 | 8.829462  |
| 22 H    | 4.227261  | 0.858897  | 9.675790  |
| 23 Ga   | 10.538060 | 2.066295  | 8.824677  |
| 24 Br   | 11.586802 | 2.068906  | 10.934710 |
| 25 Br   | 10.755483 | 4.056245  | 7.581913  |
| 26 Br   | 10.751567 | 0.071173  | 7.589213  |

Sum of electronic and thermal Free Energies= -10378.549655

**Structure: [(PTA-H)GaBr<sub>3</sub>]<sup>+</sup>**

| List Sy | X         | Y         | Z         |
|---------|-----------|-----------|-----------|
| 1 P     | 8.254296  | 2.067473  | 9.601444  |
| 2 N     | 5.656605  | 2.068124  | 8.560322  |
| 3 N     | 6.011694  | 3.288033  | 10.666329 |
| 4 C     | 7.103434  | 2.067715  | 8.122129  |
| 5 H     | 7.291000  | 2.954590  | 7.509967  |
| 6 C     | 7.465805  | 3.490018  | 10.541661 |
| 7 H     | 7.910676  | 3.558421  | 11.538267 |
| 8 H     | 7.675439  | 4.431897  | 10.025952 |
| 9 C     | 5.320180  | 3.331707  | 9.422537  |
| 10 H    | 5.598321  | 4.203887  | 8.826895  |
| 11 H    | 4.237696  | 3.306908  | 9.571950  |
| 12 C    | 5.664263  | 2.068345  | 11.416890 |
| 13 H    | 6.191490  | 2.068242  | 12.372187 |
| 14 H    | 4.588515  | 2.068701  | 11.614746 |
| 15 N    | 6.010932  | 0.848346  | 10.666491 |
| 16 H    | 7.290541  | 1.180664  | 7.510075  |
| 17 C    | 7.464936  | 0.645490  | 10.541768 |
| 18 H    | 7.909787  | 0.576845  | 11.538363 |
| 19 H    | 7.673996  | -0.296525 | 10.026071 |
| 20 C    | 5.319408  | 0.804891  | 9.422693  |
| 21 H    | 5.597047  | -0.067563 | 8.827212  |
| 22 H    | 4.236941  | 0.830320  | 9.572114  |
| 23 Ga   | 10.627102 | 2.066155  | 8.660602  |
| 24 Br   | 11.979459 | 2.066638  | 10.532493 |
| 25 Br   | 10.317159 | 4.051627  | 7.451887  |
| 26 Br   | 10.315346 | 0.079497  | 7.454242  |
| 27 H    | 5.057679  | 2.068257  | 7.727133  |

Sum of electronic and thermal Free Energies = -10378.885441

**Structure: GaBr<sub>3</sub>**

| List Sy | X         | Y        | Z         |
|---------|-----------|----------|-----------|
| 1 Ga    | 10.919105 | 2.062481 | 8.728915  |
| 2 Br    | 11.469815 | 2.066009 | 10.957160 |
| 3 Br    | 10.643832 | 4.051809 | 7.617537  |
| 4 Br    | 10.643137 | 0.074894 | 7.615333  |

Sum of electronic and thermal Free Energies = -9637.235923

**Structure: [(PTA-H)GaI<sub>3</sub>]<sup>+</sup>**

| List Sy | X         | Y         | Z         |
|---------|-----------|-----------|-----------|
| 1 P     | 8.195107  | 1.956202  | 9.341875  |
| 2 N     | 5.523522  | 2.076878  | 8.627040  |
| 3 N     | 6.134730  | 3.315230  | 10.662736 |
| 4 C     | 6.863100  | 2.015529  | 8.017264  |
| 5 H     | 7.025843  | 2.882734  | 7.370300  |
| 6 C     | 7.612545  | 3.421000  | 10.358145 |
| 7 H     | 8.165837  | 3.462616  | 11.300989 |
| 8 H     | 7.794966  | 4.349810  | 9.809645  |
| 9 C     | 5.280332  | 3.278772  | 9.350035  |
| 10 H    | 5.548482  | 4.167249  | 8.774183  |
| 11 H    | 4.238604  | 3.340300  | 9.675214  |
| 12 C    | 5.808541  | 2.015242  | 11.474018 |
| 13 H    | 6.441260  | 2.031647  | 12.364128 |
| 14 H    | 4.756445  | 2.101572  | 11.757504 |
| 15 N    | 6.033301  | 0.857452  | 10.676895 |
| 16 H    | 6.939104  | 1.122844  | 7.390317  |
| 17 C    | 7.457245  | 0.594295  | 10.406363 |
| 18 H    | 8.014315  | 0.518277  | 11.344972 |
| 19 H    | 7.560301  | -0.363104 | 9.888202  |
| 20 C    | 5.214183  | 0.896085  | 9.452558  |
| 21 H    | 5.390436  | -0.009473 | 8.870024  |
| 22 H    | 4.157685  | 0.927573  | 9.734030  |
| 23 Ga   | 10.688129 | 2.139975  | 8.831297  |
| 24 I    | 11.455578 | 2.208002  | 11.287145 |
| 25 I    | 10.540321 | 4.398882  | 7.606430  |
| 26 I    | 11.037343 | 0.011137  | 7.477306  |
| 27 H    | 5.851408  | 4.130260  | 11.218046 |

Sum of electronic and thermal Free Energies = -2698.895781

**Structure: [(PTA)GaI<sub>3</sub>]**

| List Sy | X         | Y         | Z         |
|---------|-----------|-----------|-----------|
| 1 P     | 8.183076  | 2.069361  | 9.410967  |
| 2 N     | 5.546149  | 2.068725  | 8.599483  |
| 3 N     | 6.061796  | 3.301785  | 10.673533 |
| 4 C     | 6.899513  | 2.068992  | 8.035596  |
| 5 H     | 7.047054  | 2.952428  | 7.406425  |
| 6 C     | 7.494972  | 3.493176  | 10.430179 |
| 7 H     | 8.035859  | 3.549198  | 11.380126 |
| 8 H     | 7.665727  | 4.432851  | 9.895400  |
| 9 C     | 5.288572  | 3.266772  | 9.418945  |
| 10 H    | 5.511498  | 4.162253  | 8.831139  |
| 11 H    | 4.224886  | 3.278202  | 9.676551  |
| 12 C    | 5.790157  | 2.067616  | 11.432726 |
| 13 H    | 6.387775  | 2.067346  | 12.349212 |
| 14 H    | 4.731445  | 2.067199  | 11.710321 |
| 15 N    | 6.062569  | 0.834542  | 10.672489 |
| 16 H    | 7.047398  | 1.185425  | 7.406631  |
| 17 C    | 7.495764  | 0.644361  | 10.429158 |
| 18 H    | 8.036603  | 0.588134  | 11.379119 |
| 19 H    | 7.666924  | -0.294911 | 9.893892  |
| 20 C    | 5.288981  | 0.870091  | 9.418201  |
| 21 H    | 5.512034  | -0.024973 | 8.829834  |
| 22 H    | 4.225370  | 0.858199  | 9.676179  |
| 23 Ga   | 10.539276 | 2.068059  | 8.825867  |
| 24 I    | 11.696122 | 2.069594  | 11.143044 |
| 25 I    | 10.785622 | 4.255002  | 7.460819  |
| 26 I    | 10.783177 | -0.122384 | 7.465753  |

Sum of electronic and thermal Free Energies = -2698.559737

**Structure: GaI<sub>3</sub>**

| List Sy | X         | Y         | Z         |
|---------|-----------|-----------|-----------|
| 1 Ga    | 10.948811 | 2.067460  | 8.724513  |
| 2 I     | 11.555432 | 2.069045  | 11.169916 |
| 3 I     | 10.648284 | 4.249995  | 7.502150  |
| 4 I     | 10.644524 | -0.114461 | 7.502422  |

Sum of electronic and thermal Free Energies = -1957.248623
